# Supplementary material for: Bioactive Compounds from the Bornean Endemic Plant Goniothalamus longistipetes
Source: Antibiotics (Basel). 2020 Dec 16;9(12):913. doi: 10.3390/antibiotics9120913 (PMC7767169; doi:10.3390/antibiotics9120913)
Supplement: Supplementary file 1 [file antibiotics-09-00913-s001.pdf]

# **Bioactive Compounds from the Bornean Endemic Plant *Goniothalamus longistipetes***

**Stephen P. Teo <sup>1,2,3,\*</sup>, Sanjib Bhakta <sup>2</sup>, Paul Stapleton <sup>1</sup> and Simon Gibbons <sup>1,4</sup>**

<sup>1</sup> Research Department of Pharmaceutical and Biological Chemistry, School of Pharmacy, University College London, 29-39 Brunswick Square, London WC1N 1AX, UK; p.stapleton@ucl.ac.uk (P.S.); s.gibbons@uea.ac.uk (S.G.)

<sup>2</sup> Department of Biological Sciences, Institute of Structural and Molecular Biology, Birkbeck, University of London, Malet Street, London WC1E 7HX, UK; s.bhakta@bbk.ac.uk

<sup>3</sup> Forest Department Sarawak, Wisma Sumber Alam, Petra Jaya, Kuching 93600, Malaysia

<sup>4</sup> School of Pharmacy, University of East Anglia, Norwich Research Park, Norwich NR4 7TJ, UK

\* Correspondence: stephetp@sarawak.gov.my

Received: 28 September 2020; Accepted: 15 December 2020; Published: date

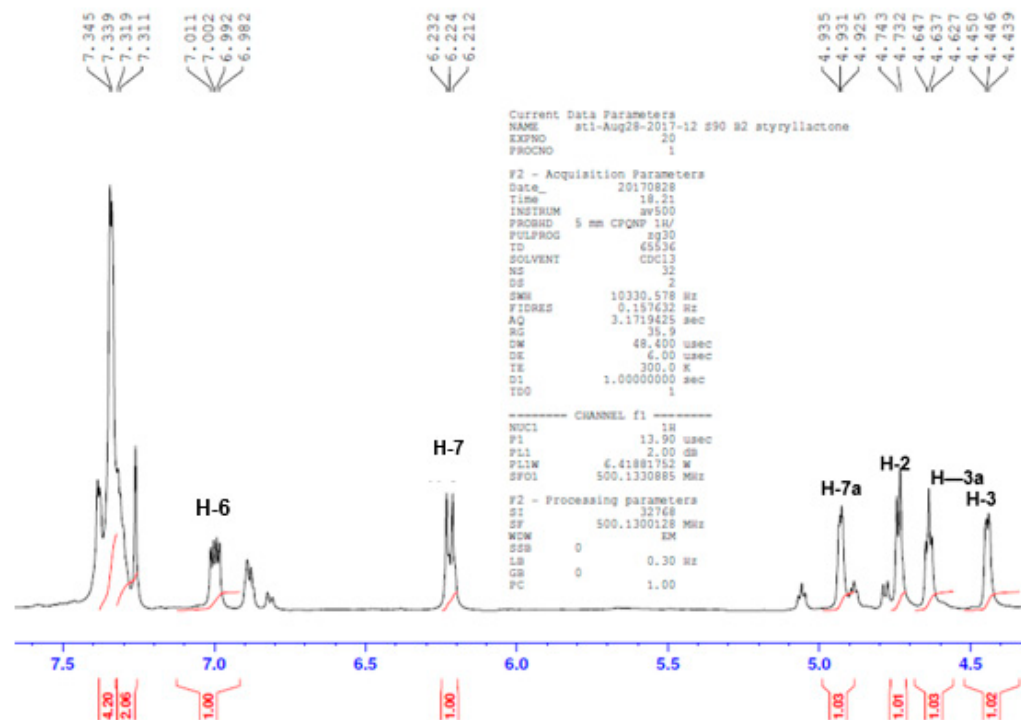

Figure S1  $^1\text{H}$  NMR spectrum of **1** in  $\text{CDCl}_3$  (500 MHz)

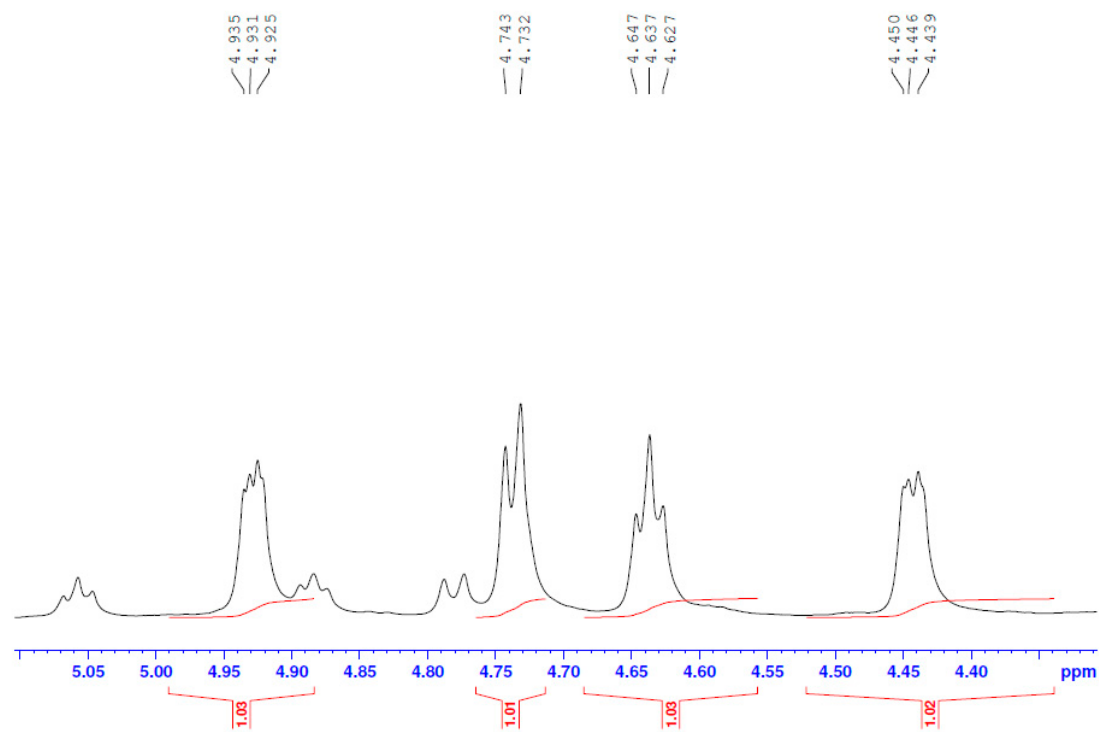

**Figure S2**  $^1\text{H}$  NMR spectrum of **1** (expanded) in  $\text{CDCl}_3$  (500 MHz)

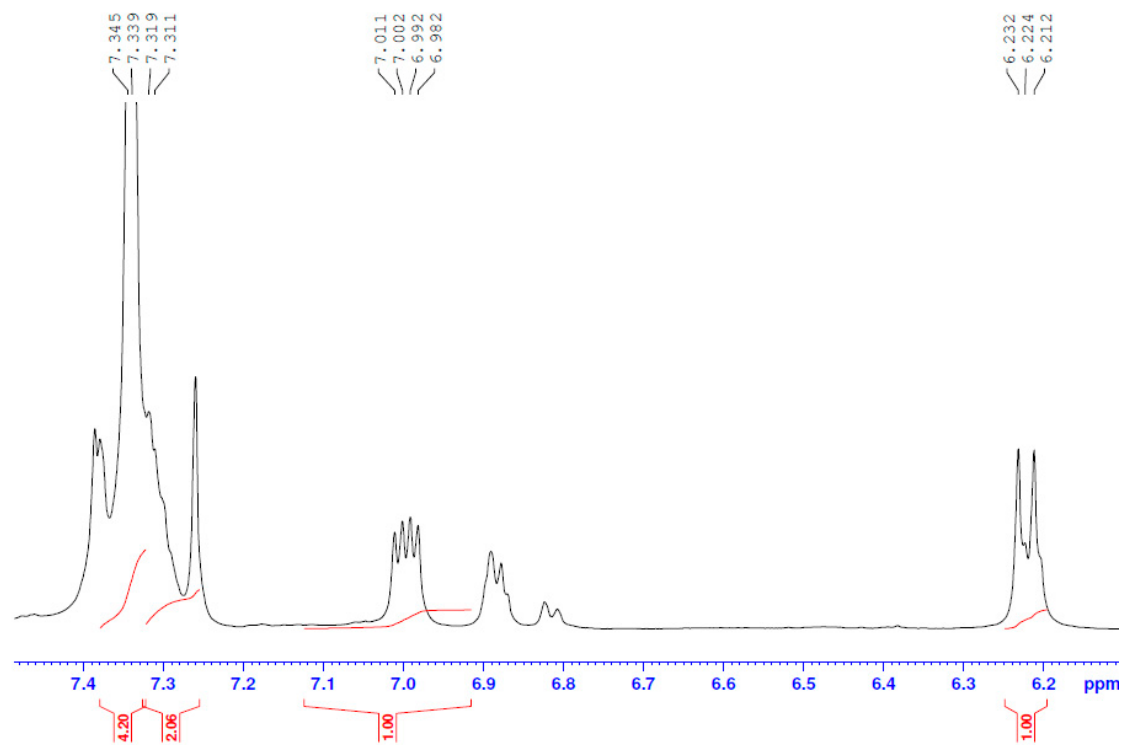

**Figure S3**  $^1\text{H}$  NMR spectrum of **1** (expanded) in  $\text{CDCl}_3$  (500 MHz)

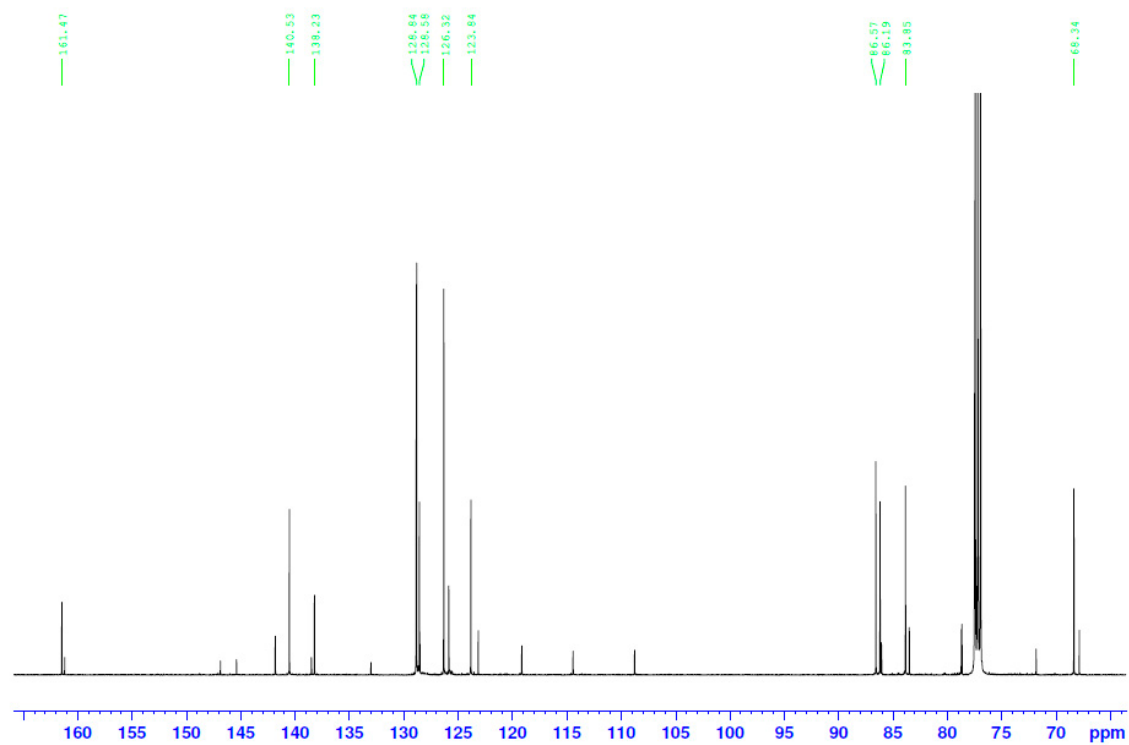

**Figure S4**  $^{13}\text{C}$  NMR spectrum of **1** in  $\text{CDCl}_3$  (500 MHz)

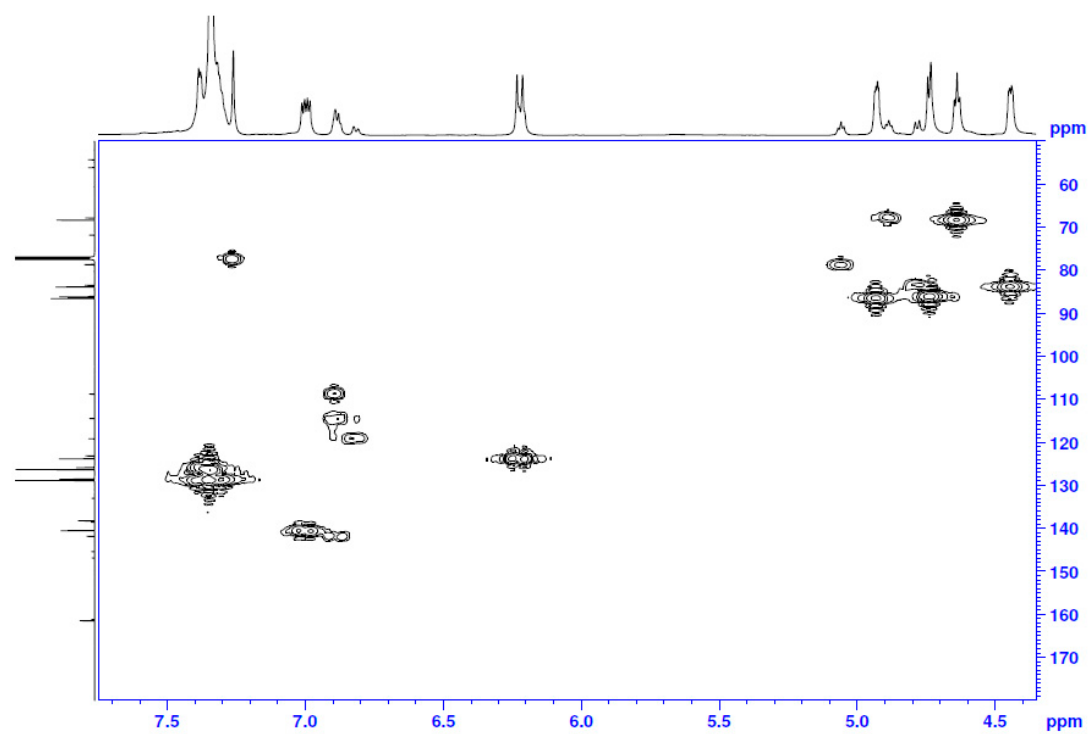

**Figure S5** Expansion of HMQC spectrum of **1** in  $\text{CDCl}_3$

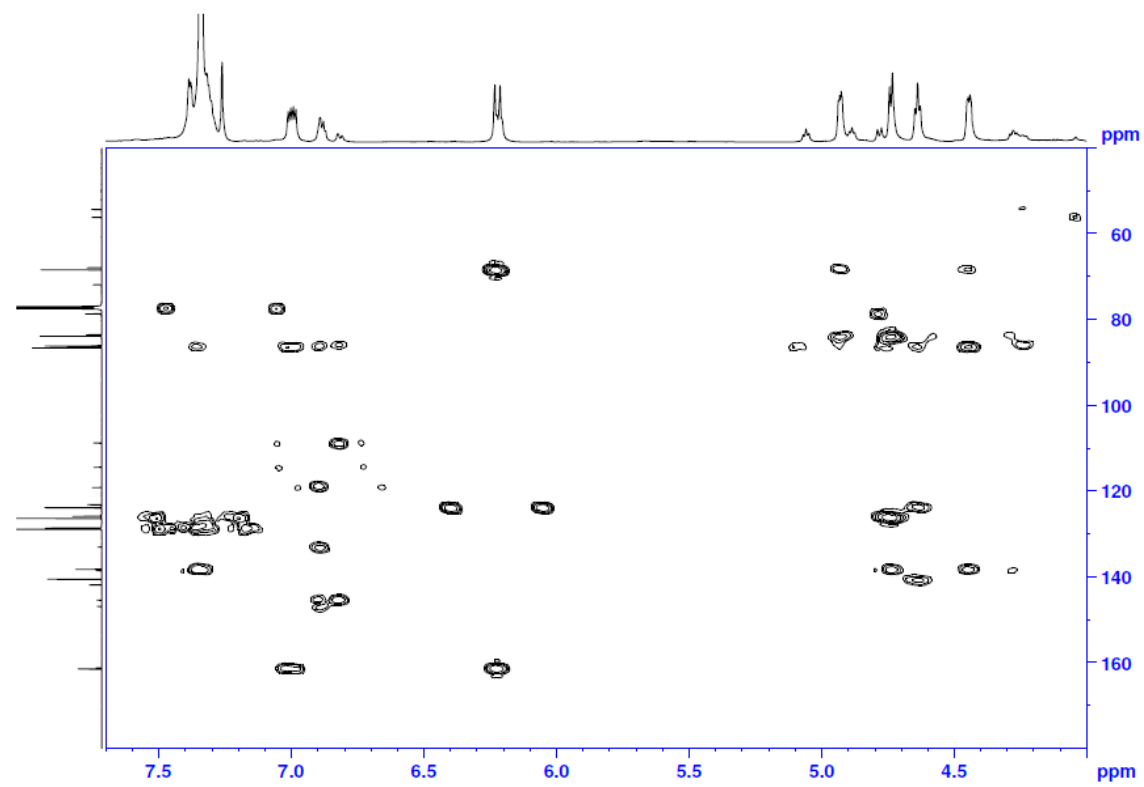

**Figure S6** Expansion of HMBC spectrum of **1** in CDCl<sub>3</sub>

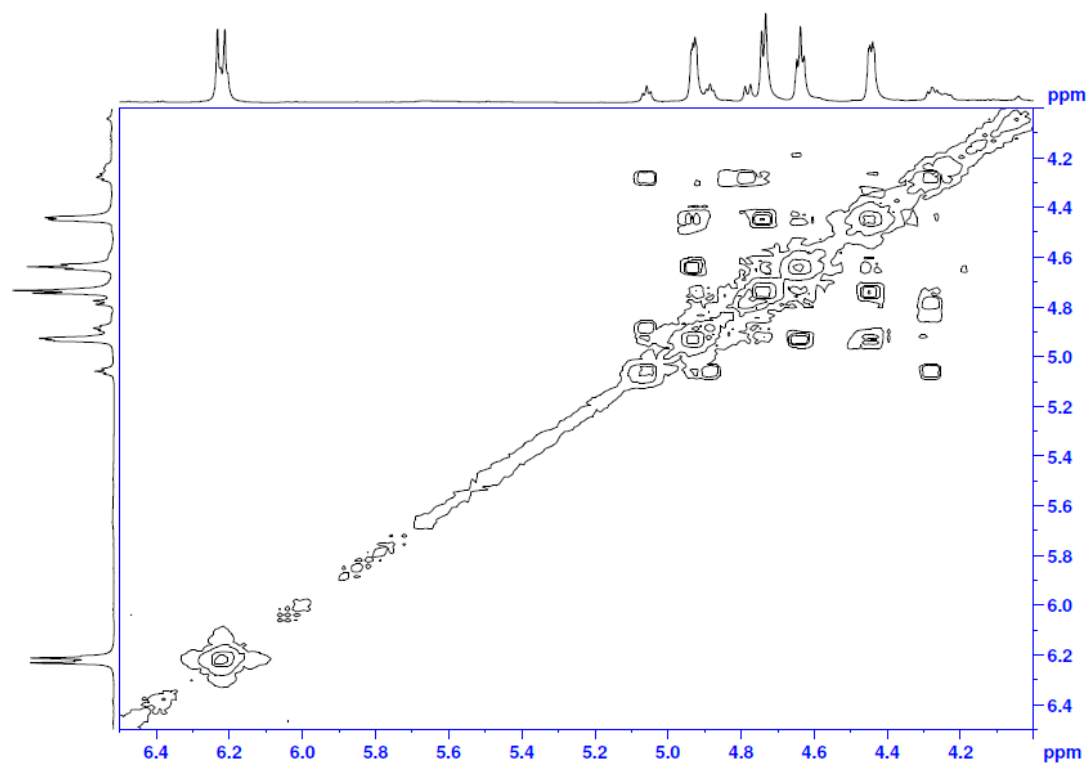

**Figure S7** Expansion of COSY spectrum of **1** in CDCl<sub>3</sub>

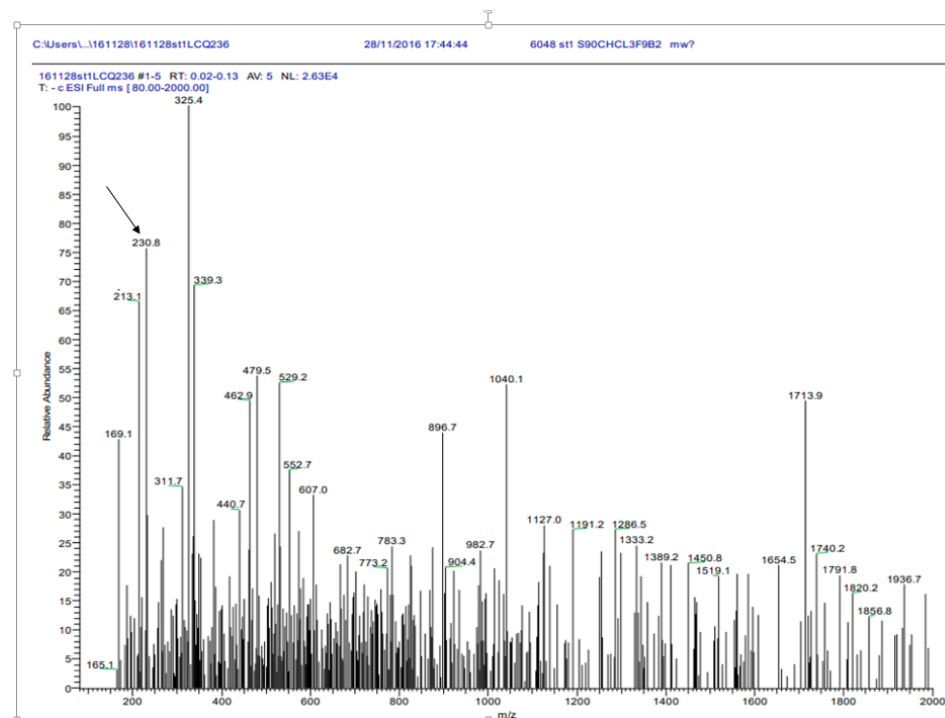

Figure S8 ESI-MS spectrum of **1** showing peak ion at  $m/z$  238.1 [M-H] (indicated by arrow)

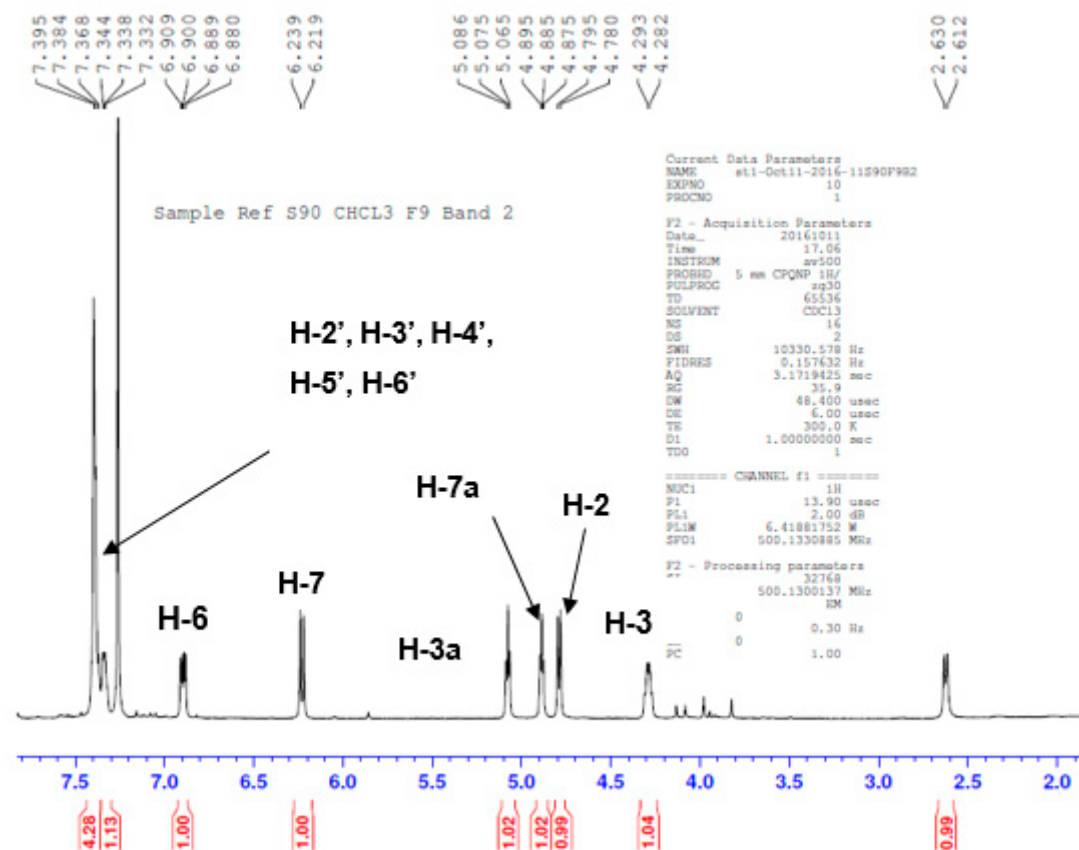

Figure S9  $^1\text{H}$  NMR spectrum of **2** in  $\text{CDCl}_3$  (500 MHz)

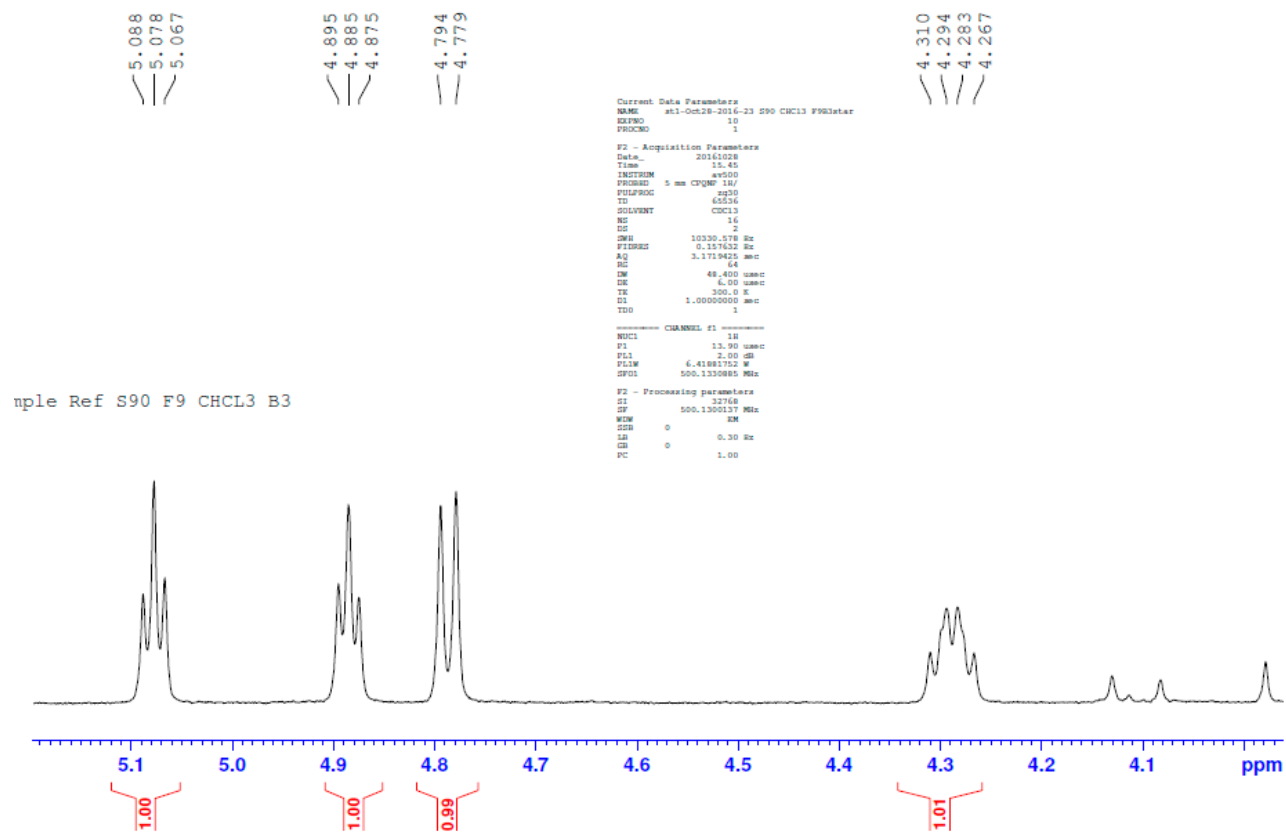

Figure S10  $^1\text{H}$  NMR spectrum of **2** in  $\text{CDCl}_3$  (500 MHz)

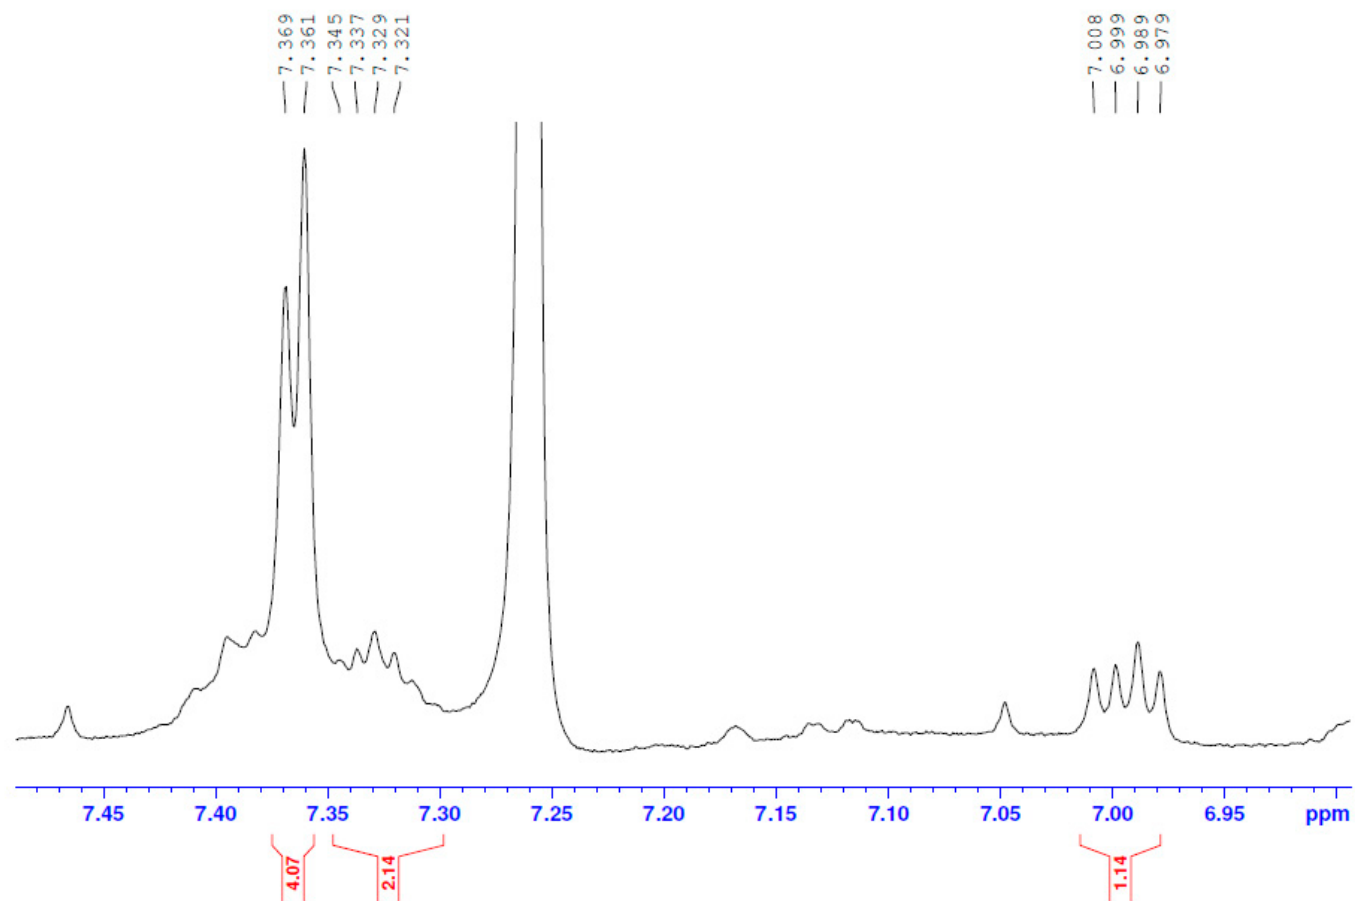

**Figure S11**  $^1\text{H}$  NMR spectrum of **2** in  $\text{CDCl}_3$  (500 MHz)

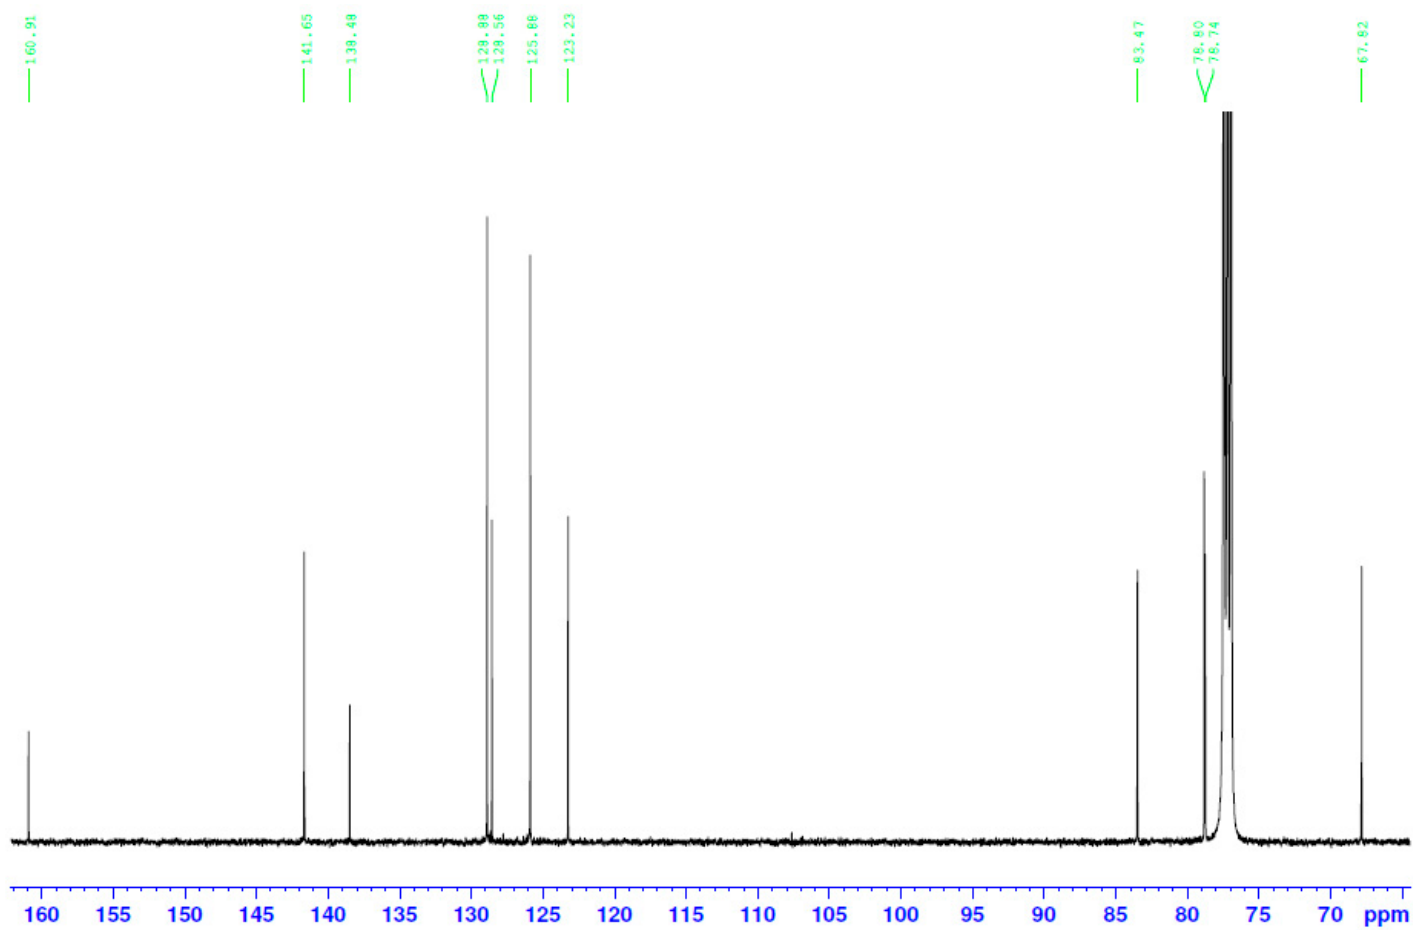

Figure S12  $^{13}\text{C}$ NMR spectrum of **2** in  $\text{CDCl}_3$  (125 MHz)

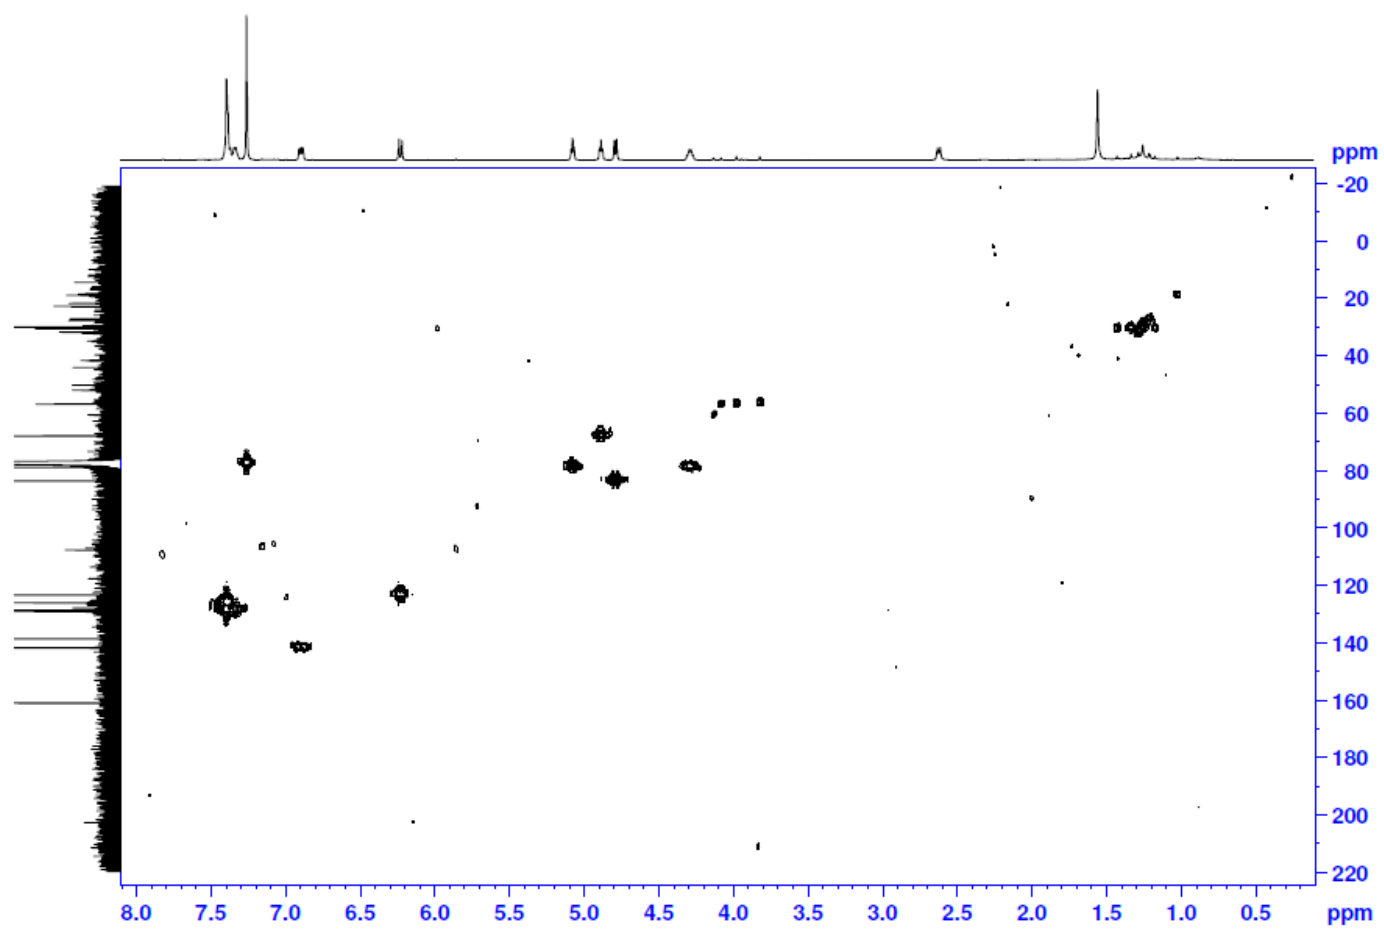

Figure S13 HMQC spectrum of 2 in CDCl<sub>3</sub>

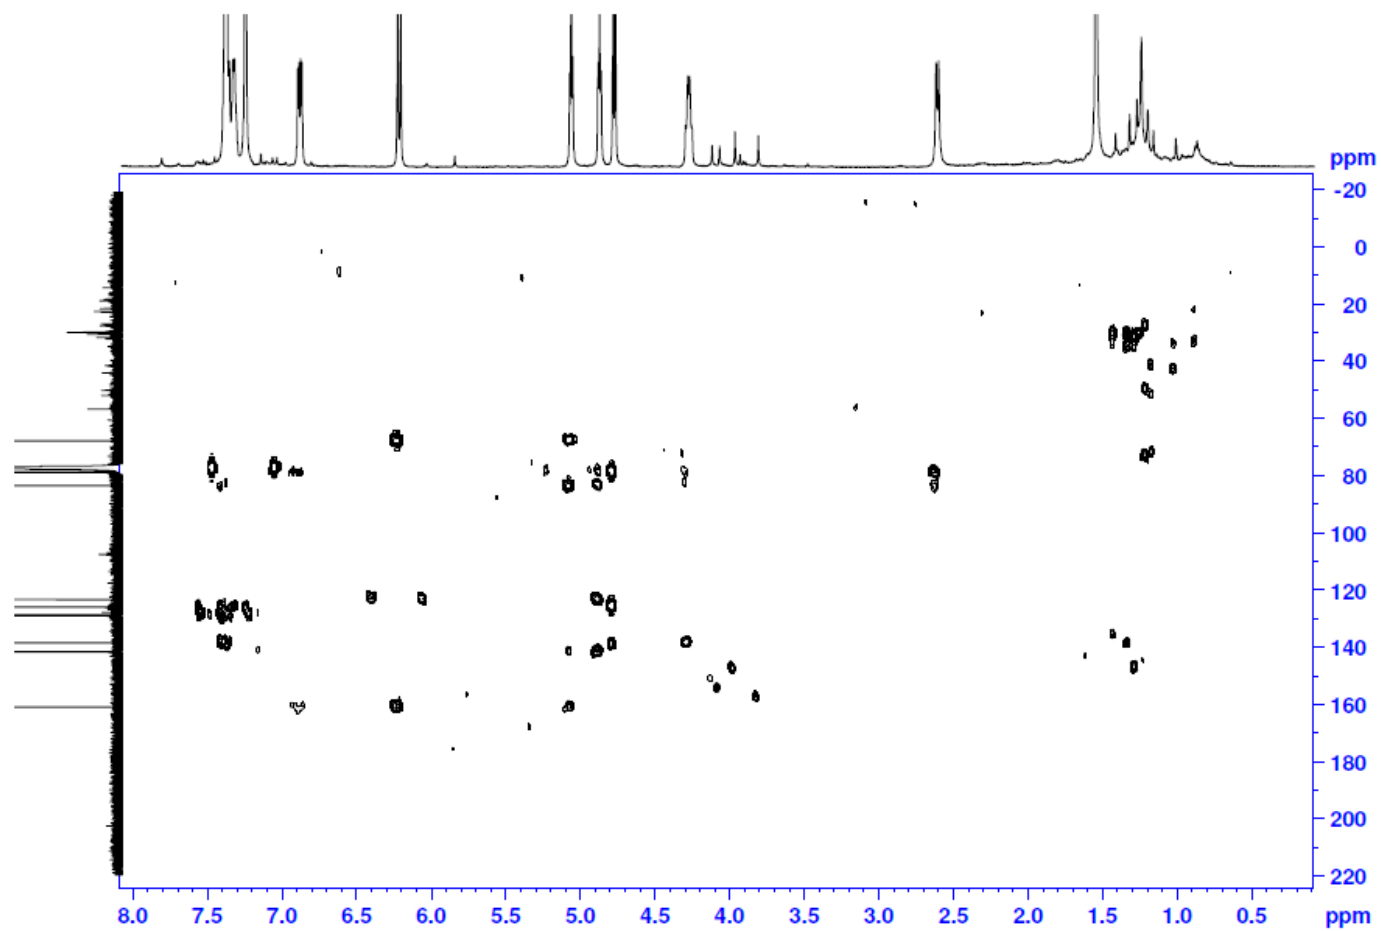

Figure S14 HMBC spectrum of **2** in  $\text{CDCl}_3$

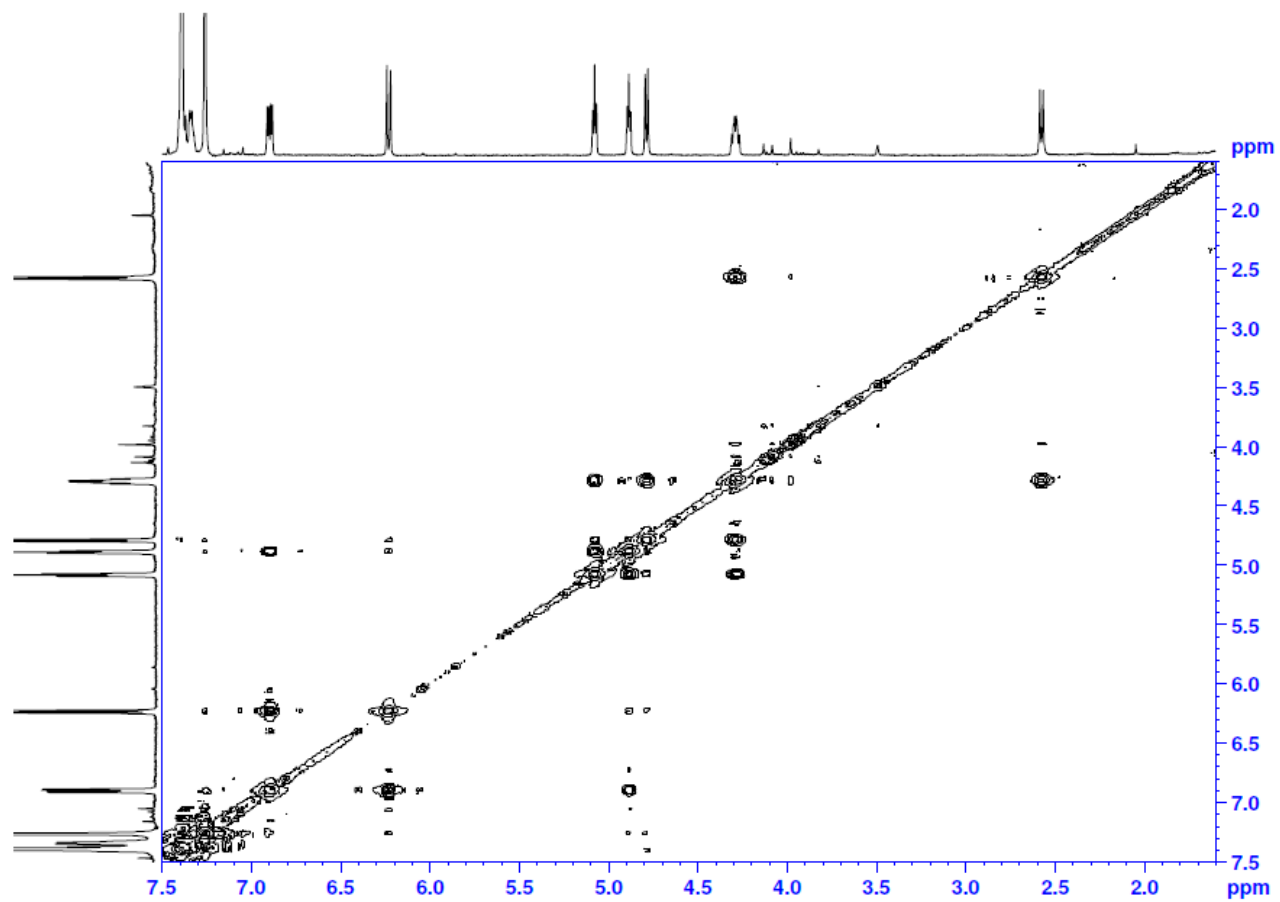

Figure S15 COSY spectrum of **2** in  $\text{CDCl}_3$

181818571QTP44719 (0.018) Is (1.00,1.00) C<sub>13</sub>H<sub>12</sub>O<sub>4</sub>N<sub>2</sub>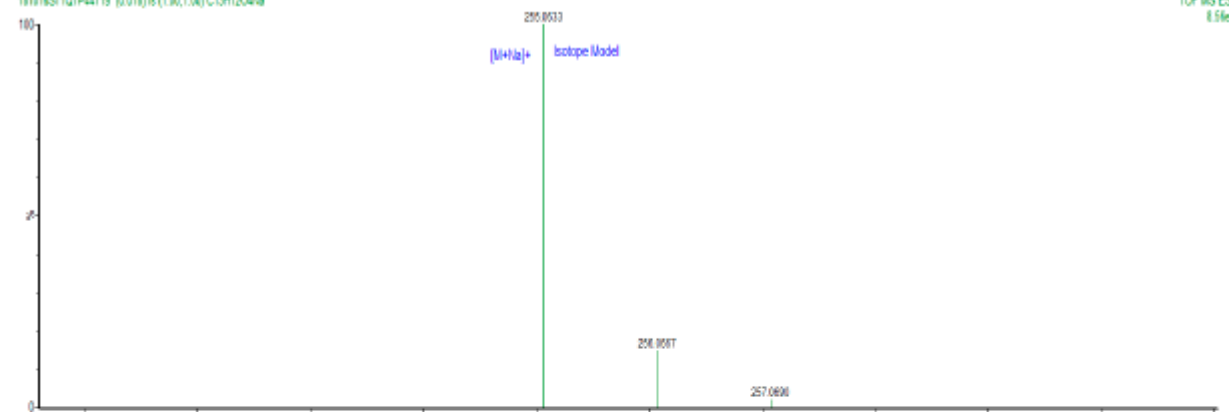

181818571QTP44719-6 (0.111) AM2 (A=19080.0, B=9.26, 1.00; C=1.9)

TOF MS ES+  
1.10e3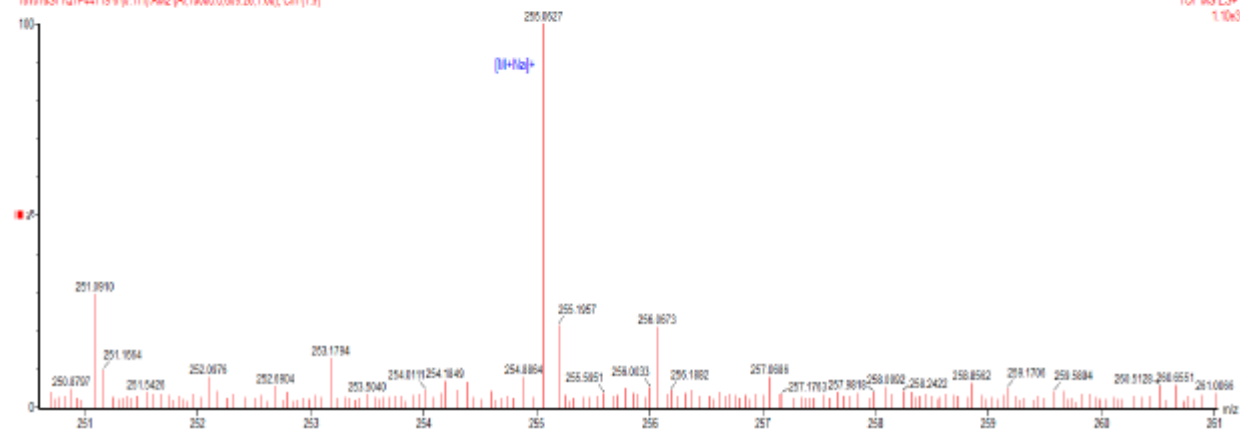

Figure S16 HRMS spectrum of 2 showing peak ion at  $m/z$  255.0627.

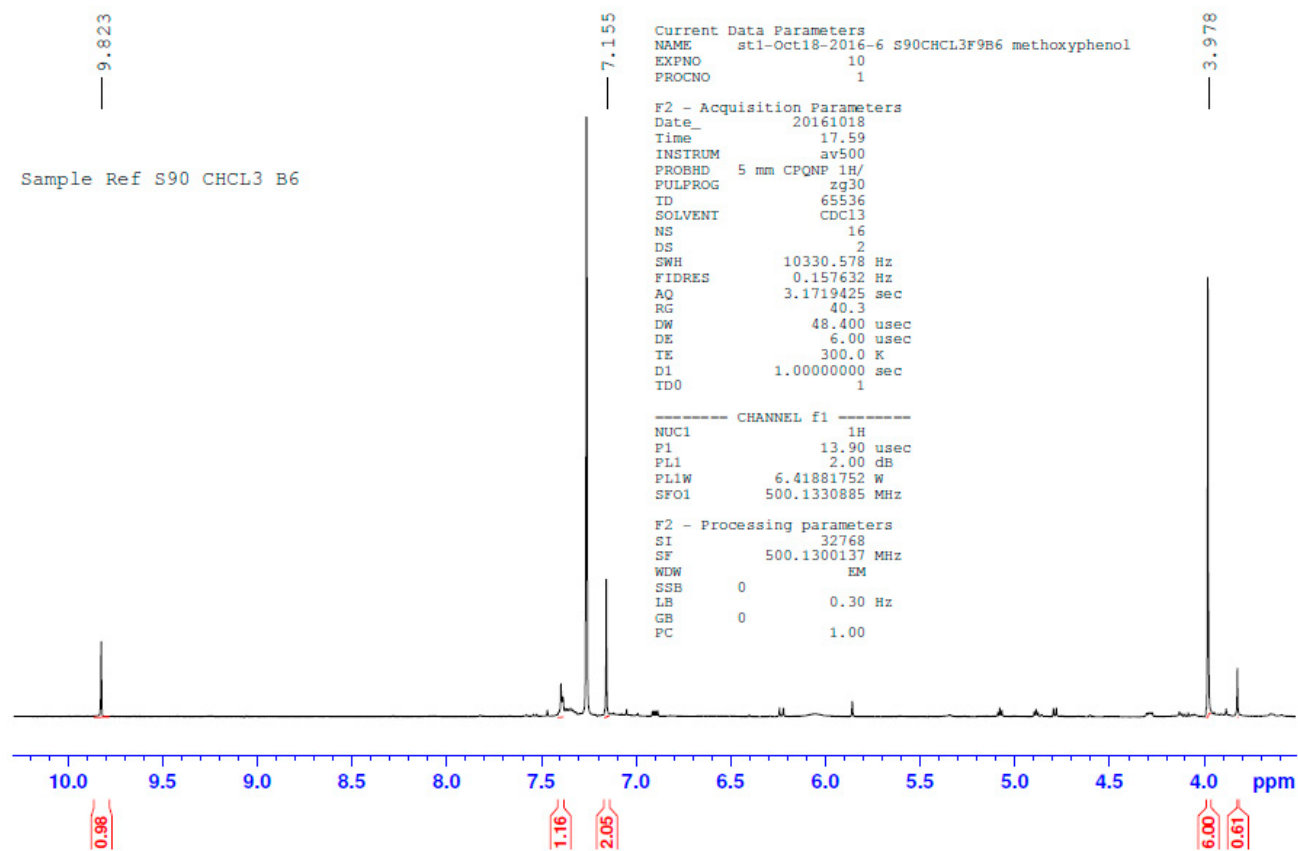

Figure S17  $^1\text{H}$  NMR spectrum of **3** in  $\text{CDCl}_3$  (500 MHz)

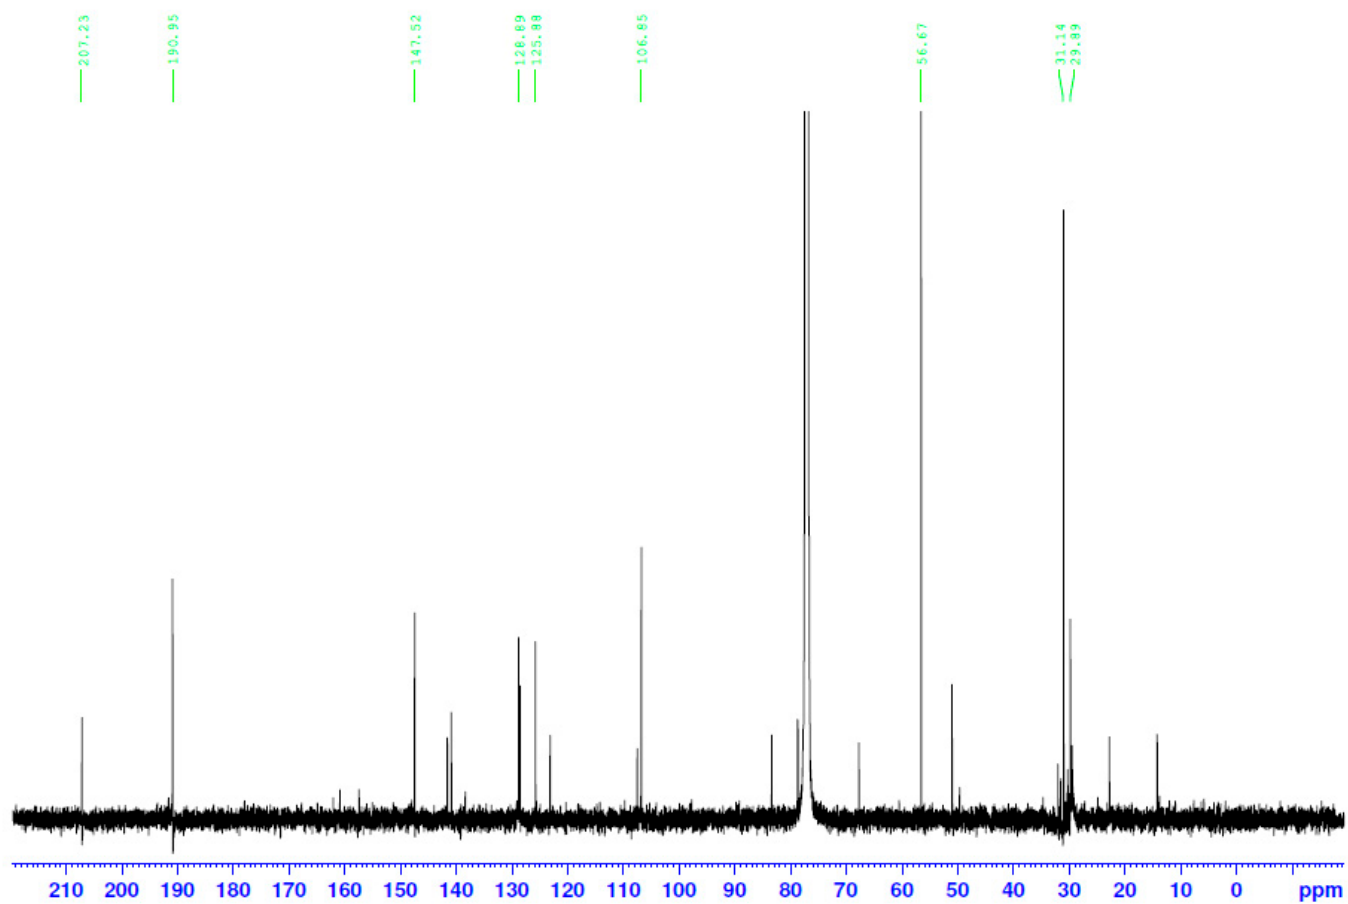

Figure S18 <sup>13</sup>C spectrum of 3 in CDCl<sub>3</sub> (125 MHz)

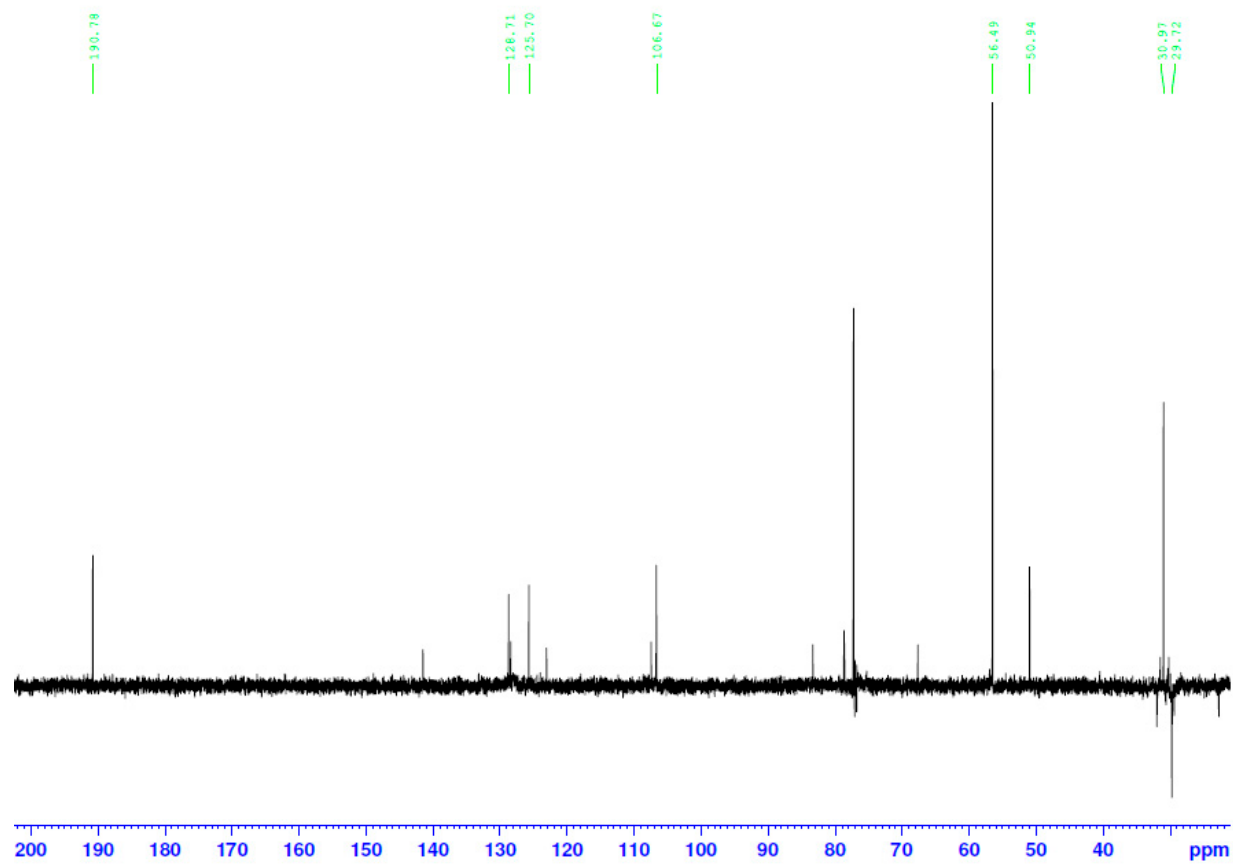

**Figure S19** <sup>13</sup>C spectrum of **3** in CDCl<sub>3</sub> (125 MHz).

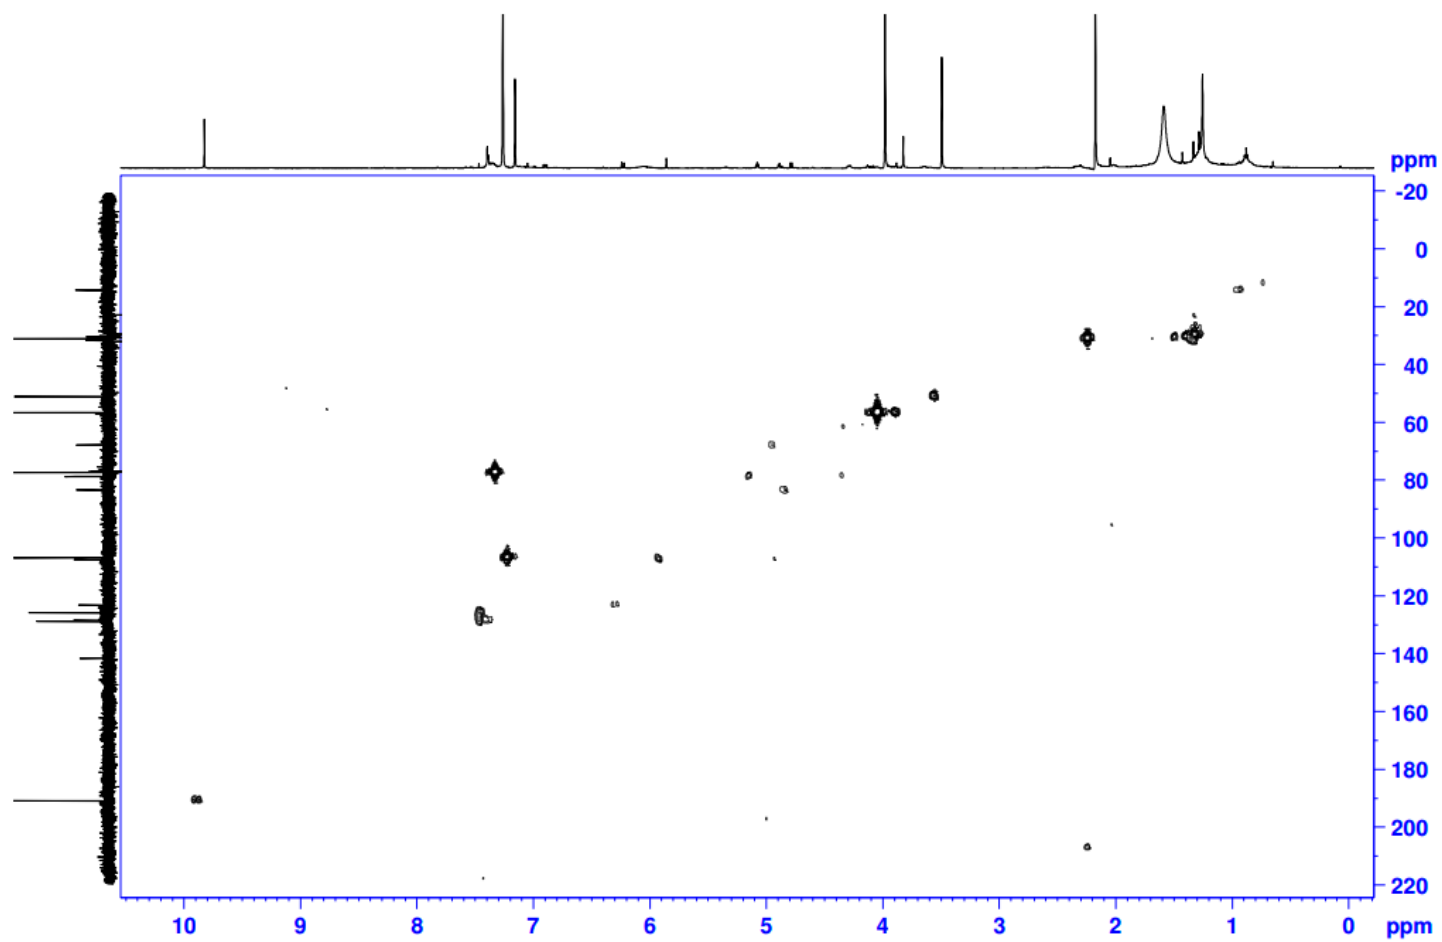

Figure S20 HMQC spectrum of 3 in CDCl<sub>3</sub>

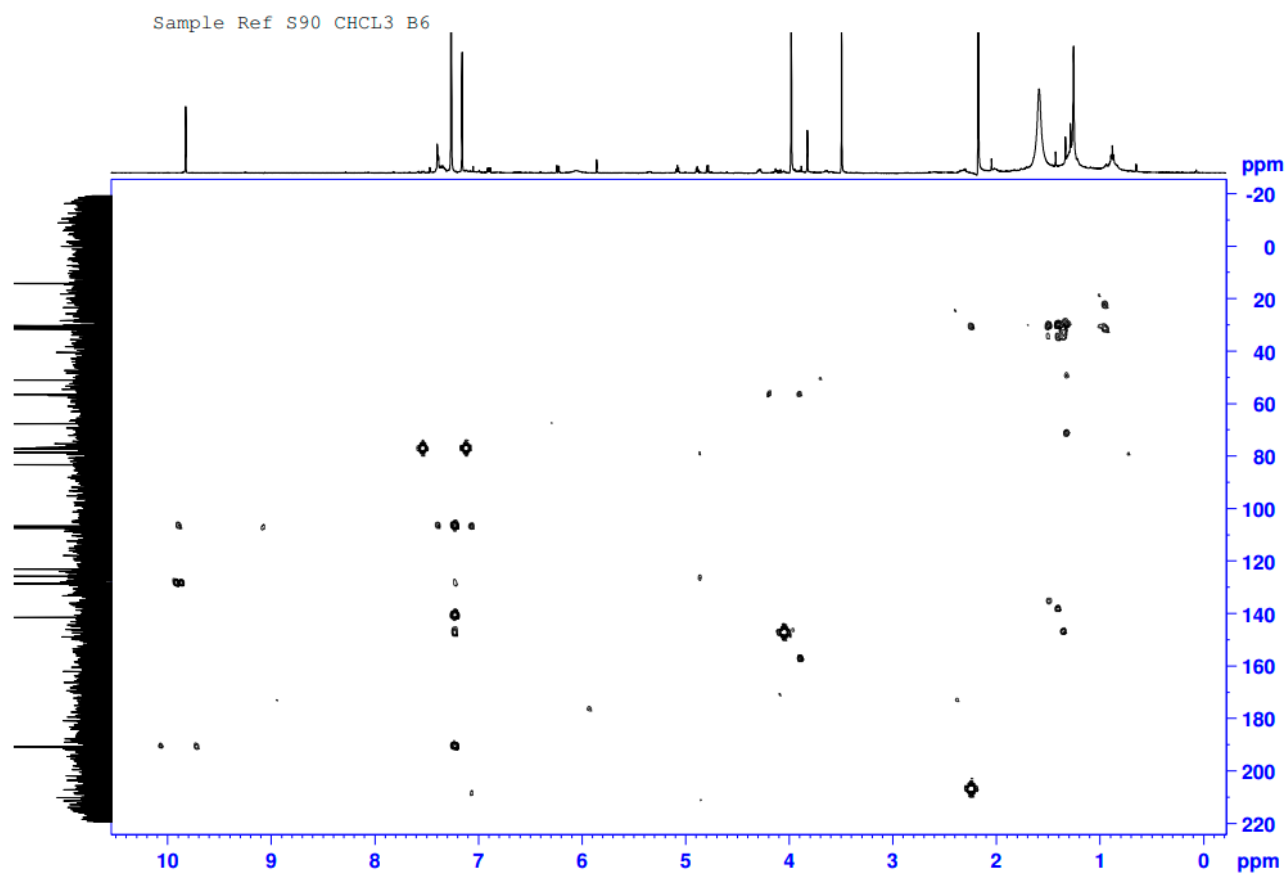

Figure S21 HMBC spectrum of **3** in CDCl<sub>3</sub>

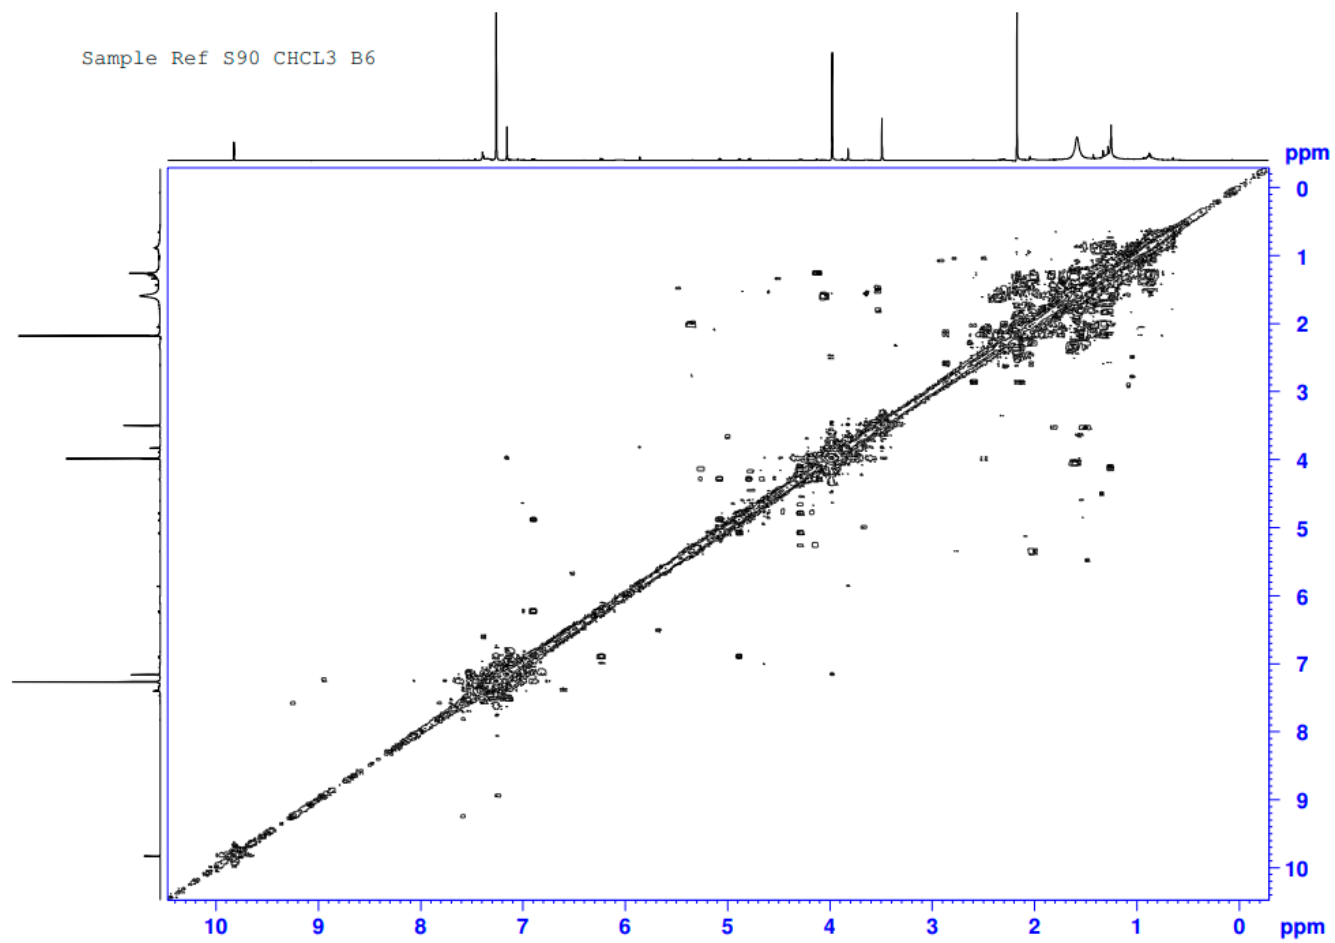

Figure S22 COSY spectrum of **3** in CDCl<sub>3</sub>

161019\161019\LCQ1243 #1-7 RT: 0.02-0.18 AV: 7 NL: 1.05E5  
T: - e ESI Full ms [80.00-2000.00]

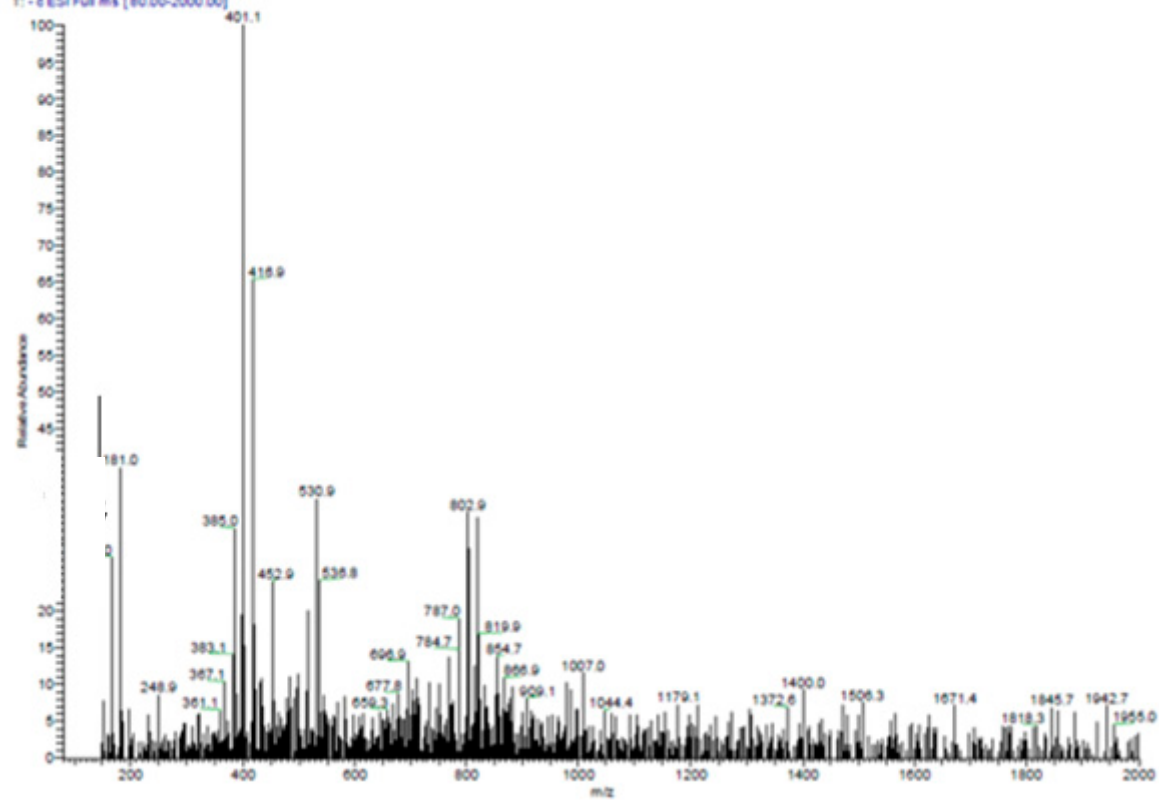

Figure S23 ESI-MS spectrum of 3 showing peak ion at  $m/z$  248.9 (indicated by arrow)

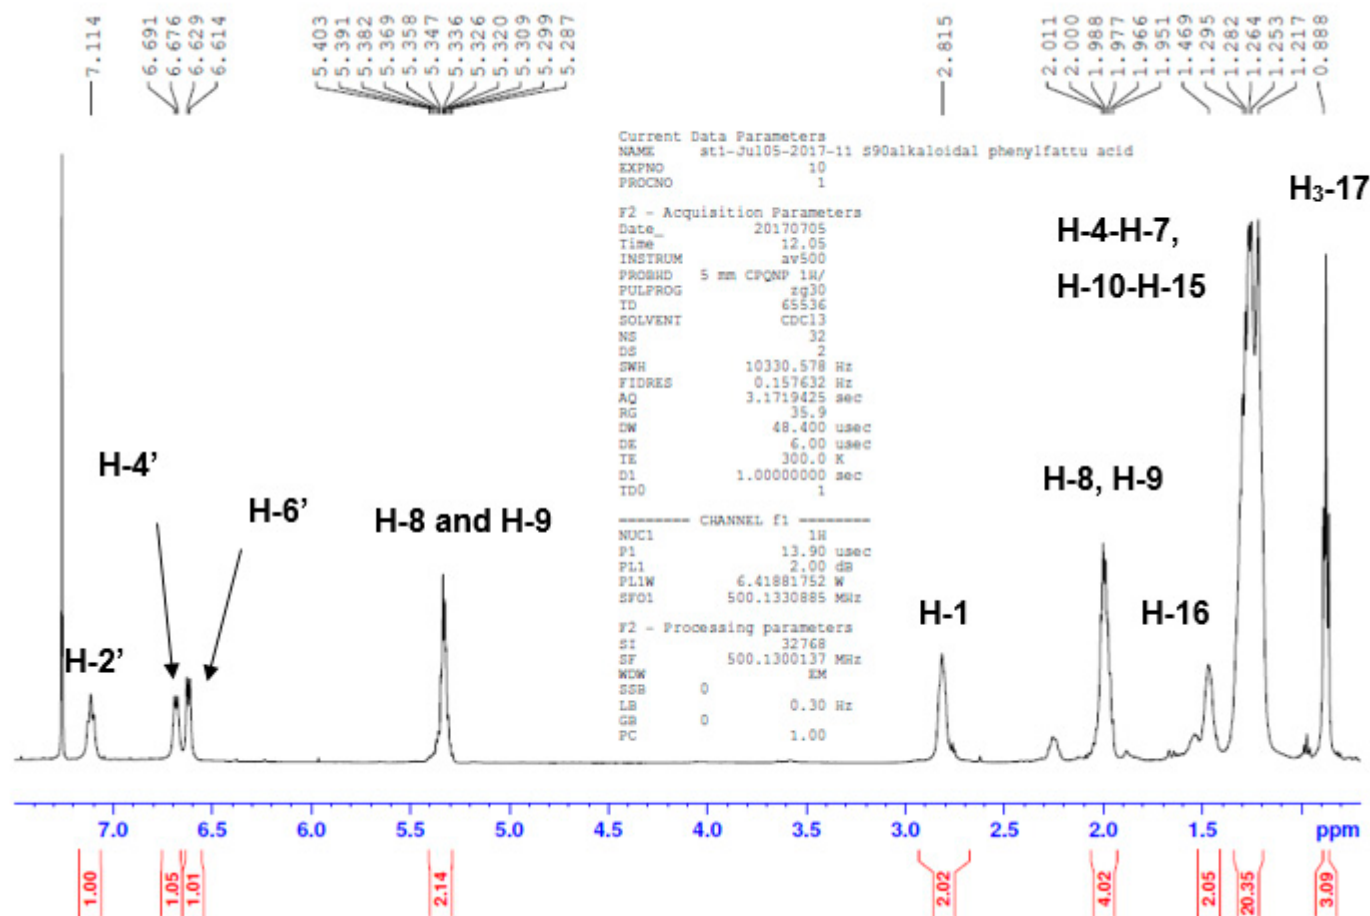

Figure S24  $^1\text{H}$  NMR spectrum of 4 in  $\text{CDCl}_3$  (500 MHz)

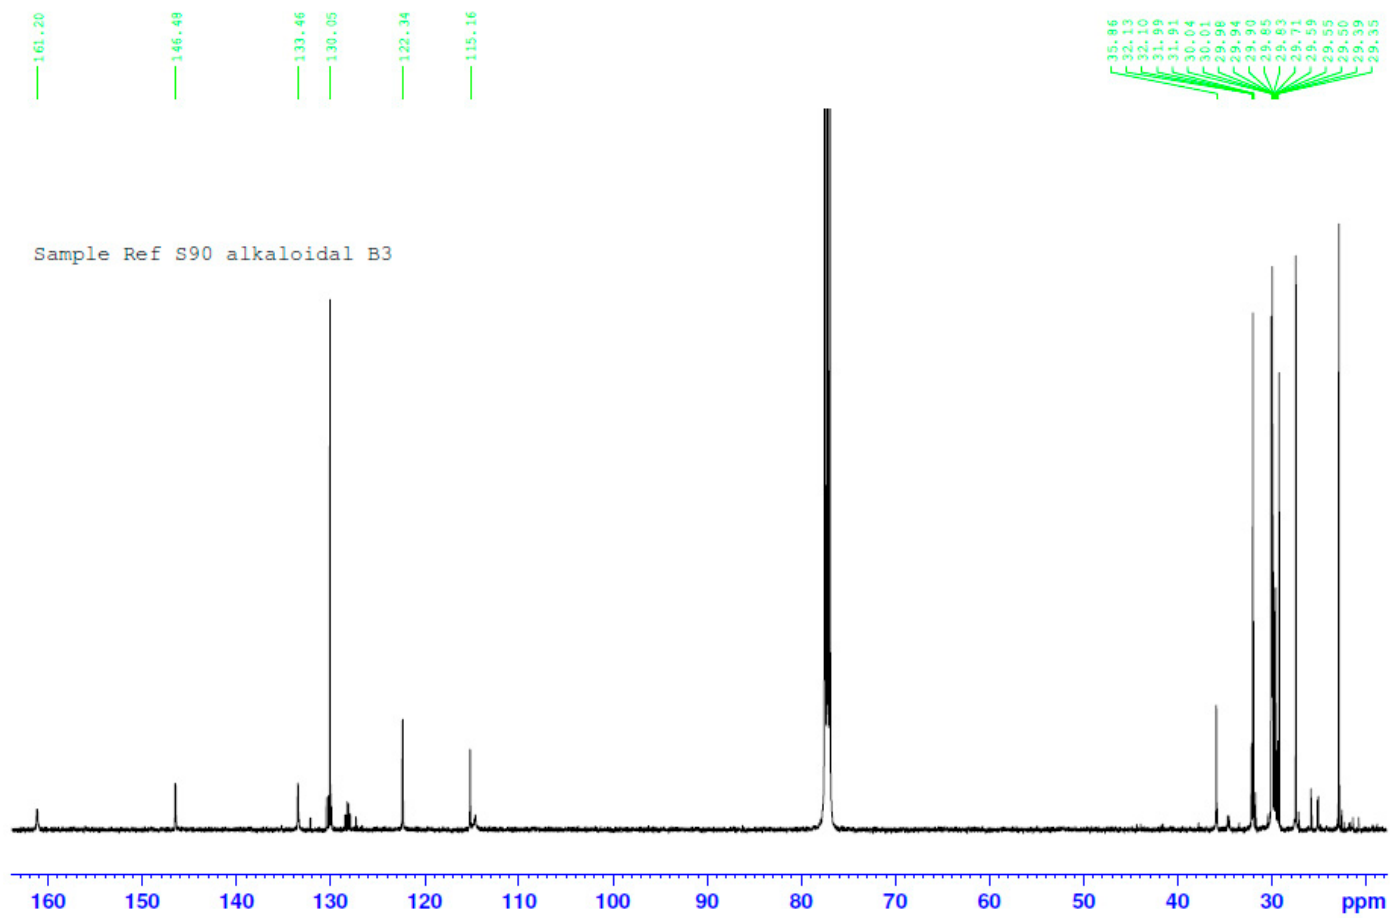

Figure S25  $^{13}\text{C}$  NMR spectrum of 4 in  $\text{CDCl}_3$  (125 MHz)

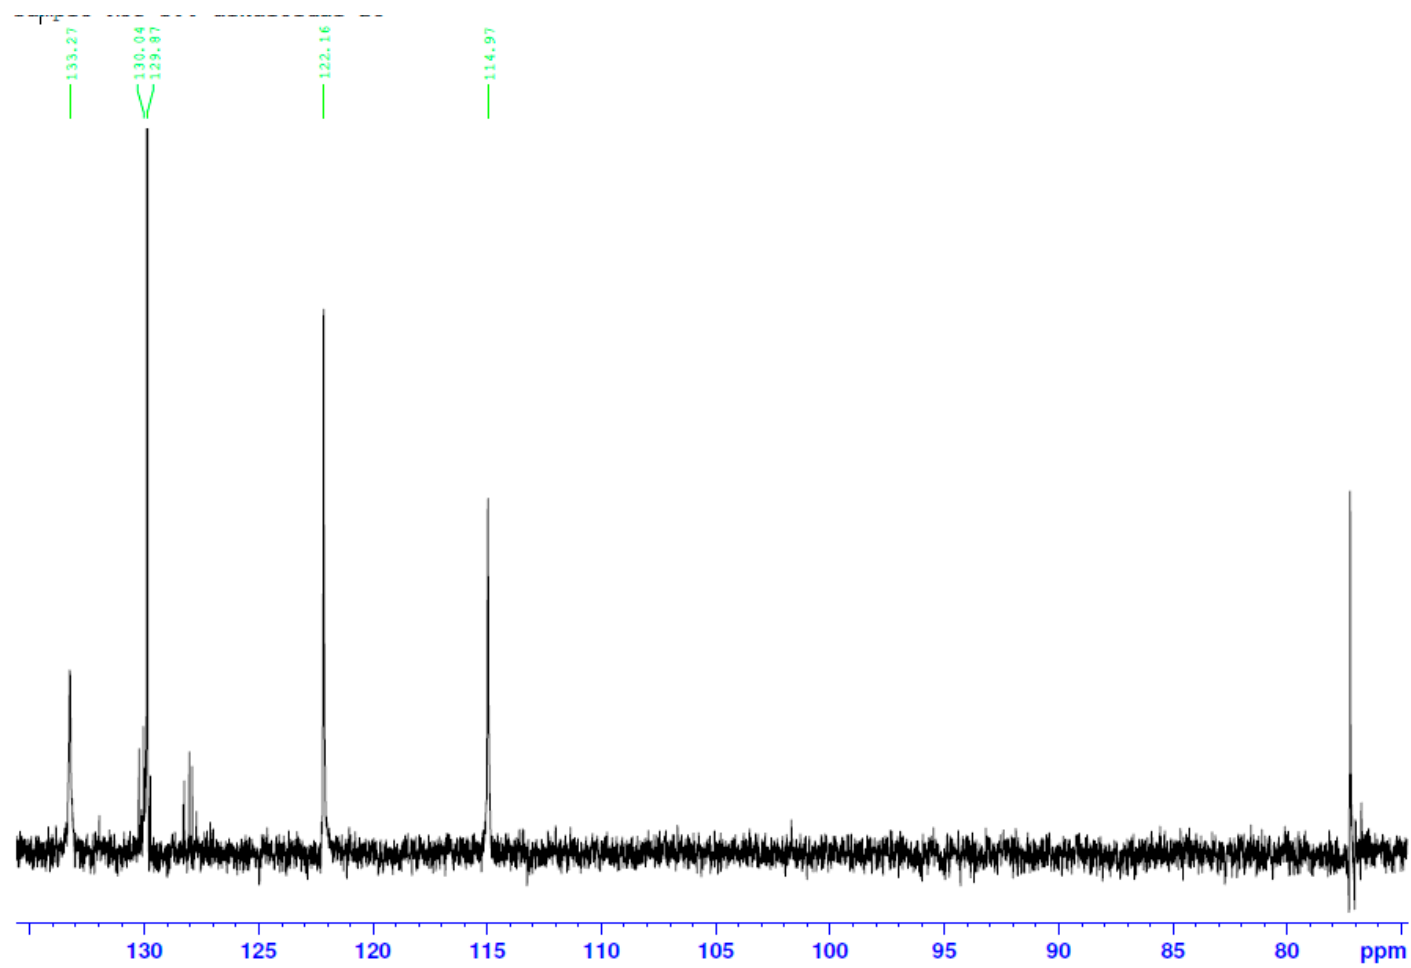

Figure S26  $^{13}\text{C}$  NMR spectrum of 4 (expanded) in  $\text{CDCl}_3$  (125 MHz)

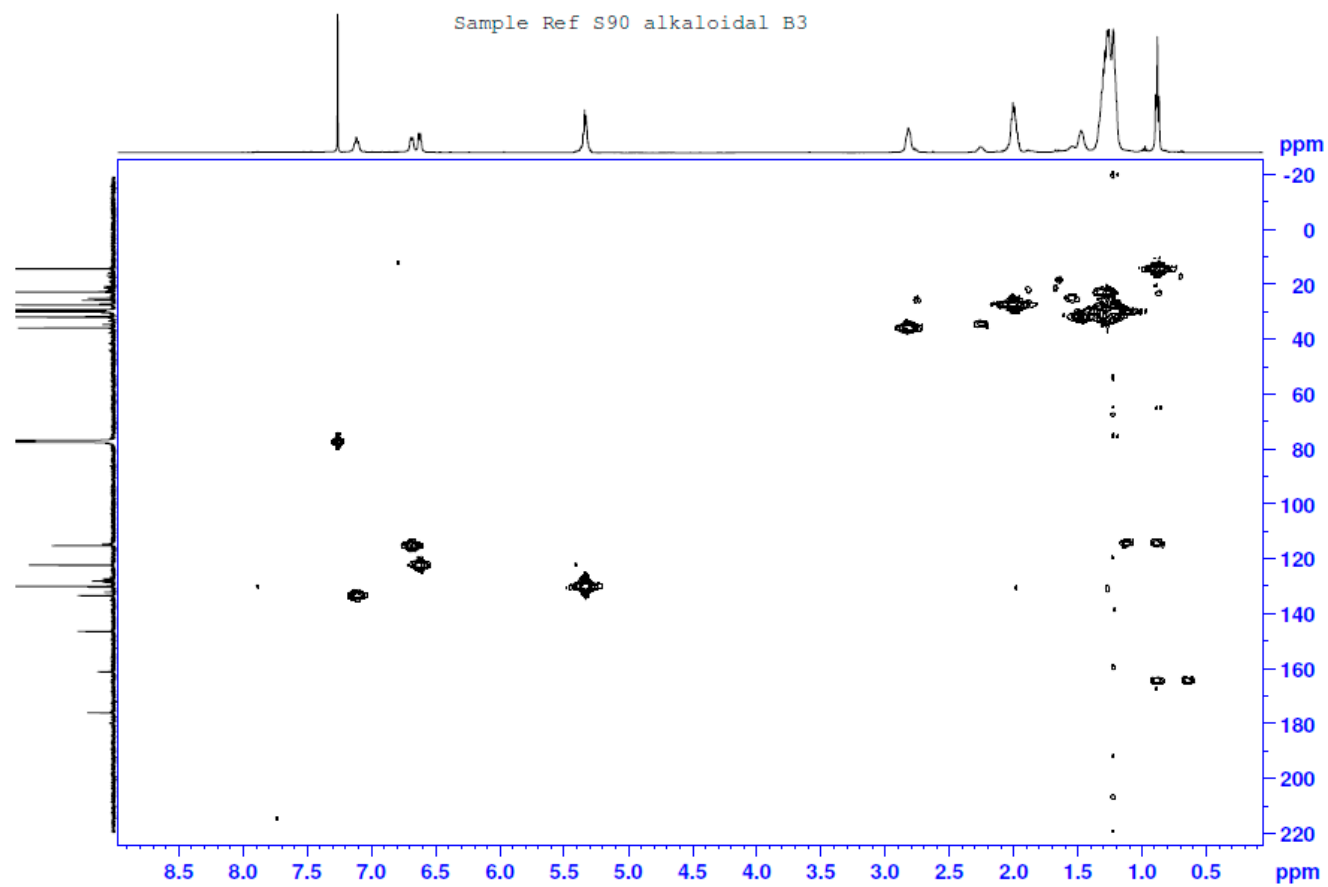

Figure S27 HMQC spectrum of **4** in CDCl<sub>3</sub>

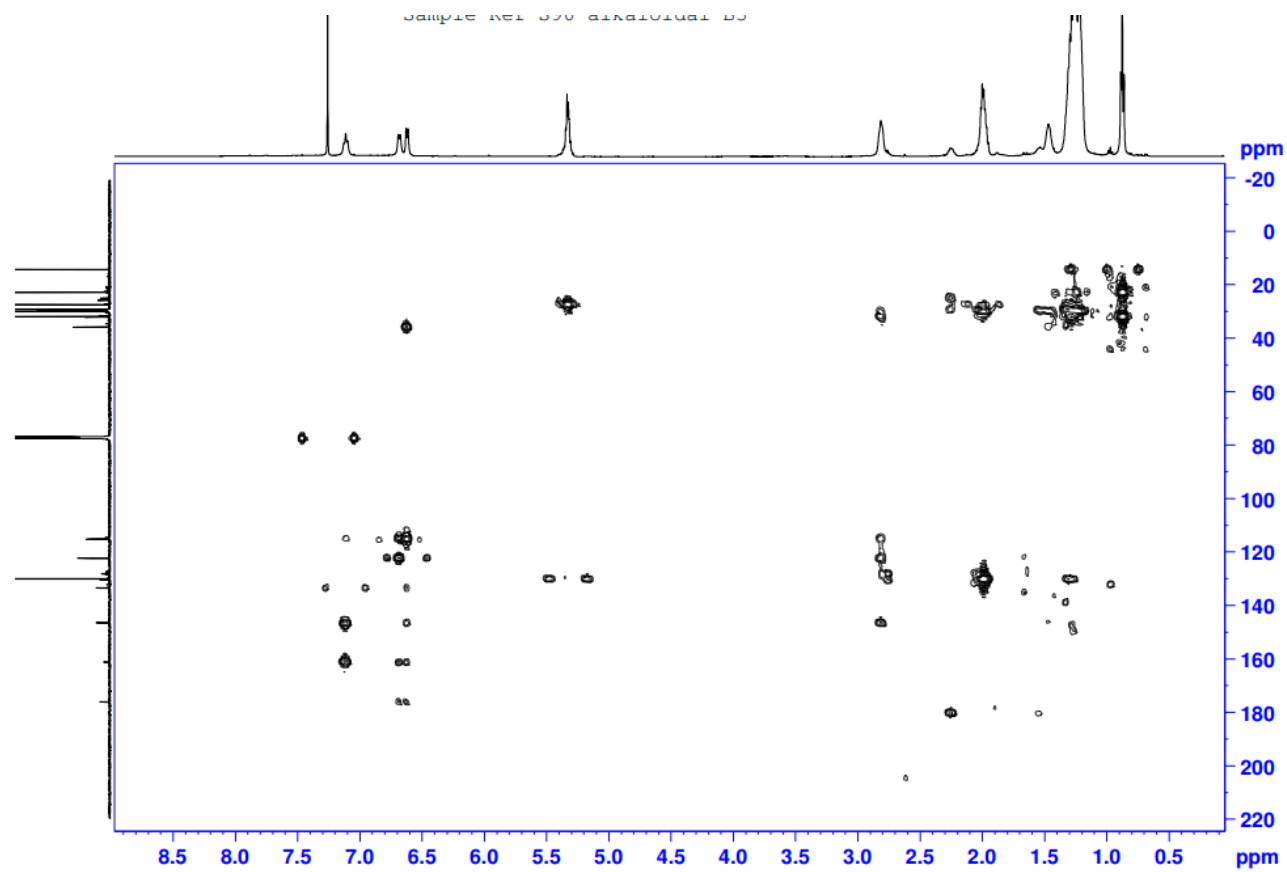

Figure S28 HMBC spectrum of **4** in CDCl<sub>3</sub>

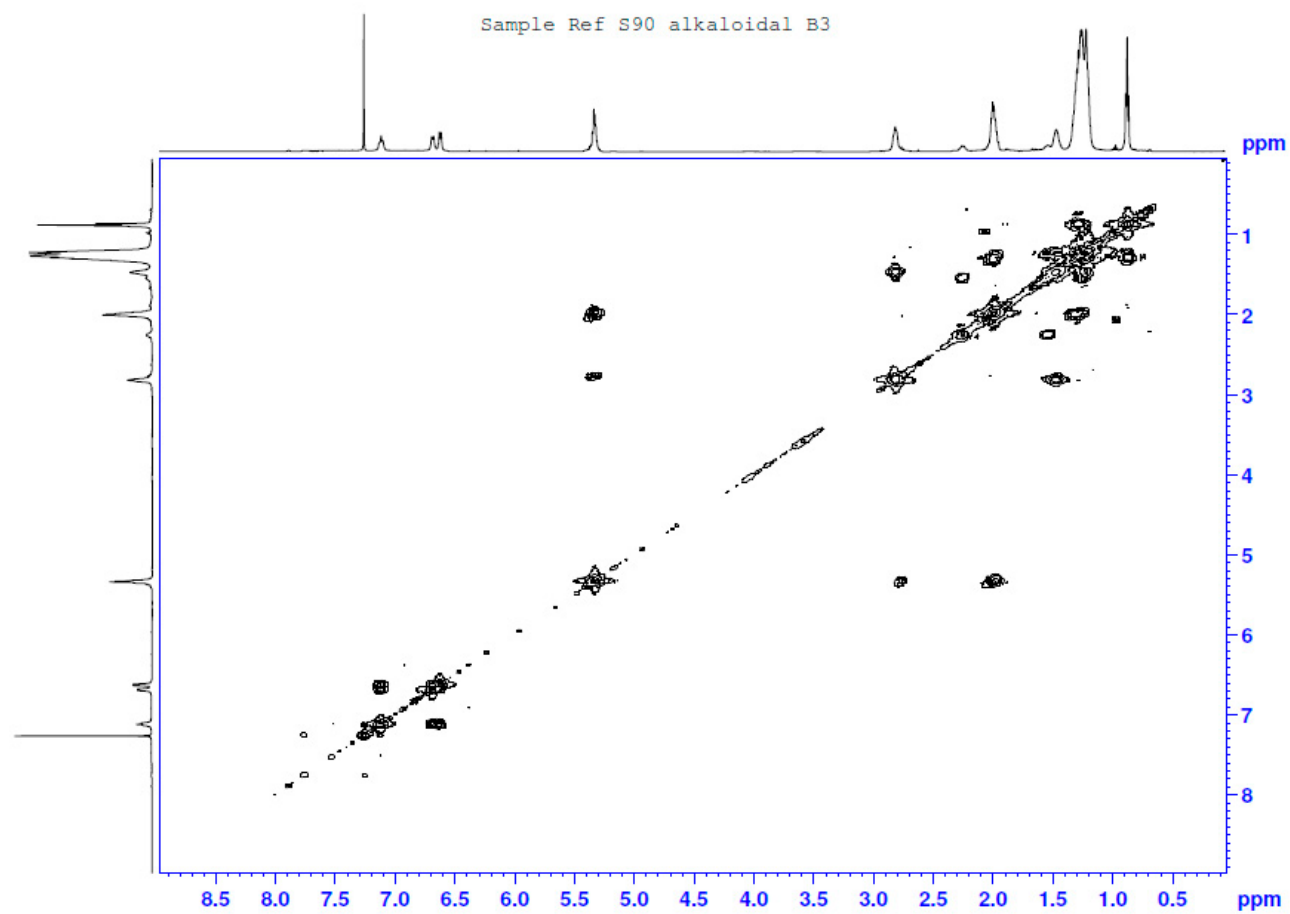

Figure S29 COSY spectrum of **4** in  $\text{CDCl}_3$

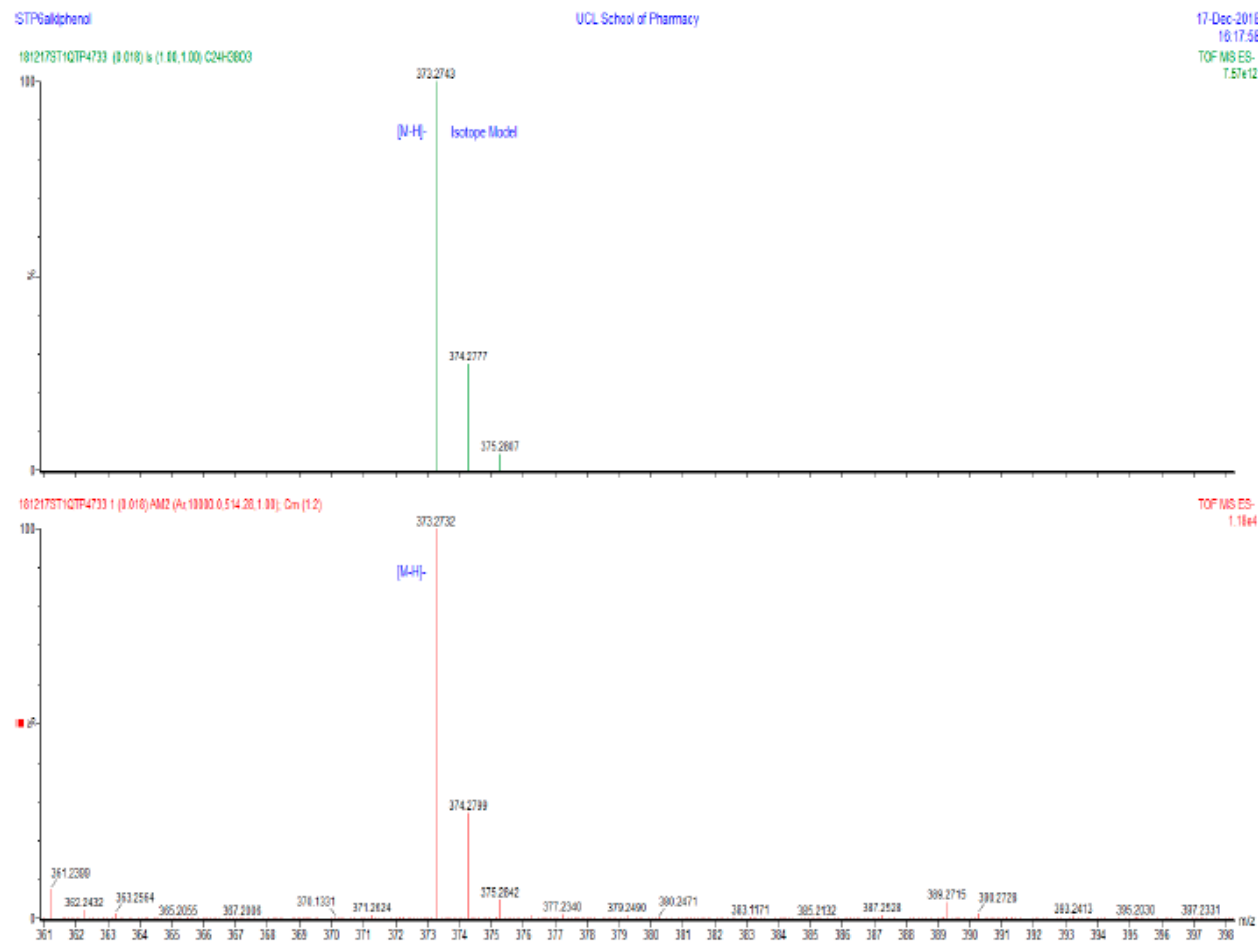

Figure S30 HRMS spectrum of 4 showing peak ion at  $m/z$  373.2732

## 1.0 Phytochemistry

Compound **1** is the known styryllactone (+)-altholactone, also known as goniothalenol ((2*S*,3*R*,3*aS*,7*aS*)-3-hydroxy-2-phenyl-2,3,3*a*,7*a*-tetrahydrobenzo-5(4*H*)-5-one). The molecular formula was determined as C<sub>13</sub>H<sub>12</sub>O<sub>4</sub> and the molecular weight of the compound was calculated as 232.07, which corresponded to an ion in the MS at *m/z* 231 [M-H]<sup>-</sup>. The <sup>1</sup>H and <sup>13</sup>C NMR data of **1** were in close agreement for those of (+)-altholactone (Table S1 and S2) [1]. The stereochemistry is determined by the size of the vicinal coupling constant between the hydrogens on the chiral centres and compared that with the 6-membered ring compound model provided by Reich (2020) [3] to ascertain their spatial orientation. There are 4 chiral centre for the styryllactone, C-2, C-3, C-3*a* and C-7*a*. The stereochemistry of **1** was also determined by analysis and comparison of its hydrogen vicinal couplings with the literature for (+)-altholactone [1]. Consequently, compound **1** was assigned as the styryllactone (+)-altholactone((2*S*,3*R*,3*aS*,7*aS*)-3-hydroxy-2-phenyl-2,3,3*a*,7*a*-tetrahydrobenzo-5(4*H*)-5-one).

Compound **2** was proposed as a new styryllactone, (2*S*,3*R*,3*aS*,7*aR*)-3-hydroxy-2-phenyl-2,3,3*a*,7*a*-tetrahydrobenzofuran-5(4*H*)-one), and are different from all other known stereoisomers i.e. the 3 synthesized epimers [4] (one was later isolated as a natural product, (+)-isoaltholactone [2]) in terms of <sup>13</sup>C and <sup>1</sup>H chemical shifts (Table S2) as well as the coupling constants. It is, however, similar to a known compound (+)-isoaltholactone since the <sup>13</sup>C and <sup>1</sup>H chemical shifts were similar [2] but differing in the coupling constant between H-3*a* and H-7*a* since the coupling constants for (+)-isoaltholactone and **2** were 5 Hz and 10 Hz respectively, hence the difference in the stereo-orientation for H-3*a* and H-7*a*. An ion peak [M+Na]<sup>+</sup> at 255.0627 in its HRMS indicated a molecular formula of C<sub>13</sub>H<sub>12</sub>O<sub>4</sub> (calcd. for C<sub>13</sub>H<sub>12</sub>O<sub>4</sub> 232.0735). The <sup>1</sup>H NMR spectrum (Table S2) showed 11 hydrogens. There were 5 deshielded aromatic hydrogens in the <sup>1</sup>H spectrum. Signals at δ<sub>H</sub> 7.34 (C-4'), a further 2 pairs of equivalent hydrogens at δ<sub>H</sub> 7.38 (H-2', H-6') and δ<sub>H</sub> 7.36 (H-3', H-5') ppm indicated the presence of a phenyl ring as in **1**. 2 olefinic hydrogens at δ<sub>H</sub> 6.90 (H-6) and 6.62 (H-7) ppm were similar to those of **1** and attributable to the olefin of the pyranone ring system. Couplings in the COSY spectrum between δ<sub>H</sub> 4.29 (H-3), 4.79 (H-2), 5.08 (H-3*a*) and 4.88 (H-7*a*) ppm could also be identified, with H-7*a* coupling to H-7. A hydroxy group could also be placed at C-3 as in **1** above. The <sup>13</sup>C NMR spectrum (Table S2) confirmed the similarities between **1** and **2** and showed 13 carbons, 6 of which are aromatic with signals appearing at δ<sub>C</sub> 128.7 (C-1'), 129.0 (C-2'/C-6'), 125.9 ppm (C-3'/C-5') and 123.9 (C-4') ppm. As with **1**, there was a 7-carbon cyclic structure (furo-pyranone) attached to the phenyl ring – one of the carbons was a carbonyl at signal δ<sub>C</sub> 160.1 (C-5), 2 olefinic carbons at signal δ<sub>C</sub> 138.1 (C-6) and 140.3 (C-7) ppm. The other 3 carbons were attached to oxygen with resonances at δ<sub>C</sub> 83.5 (C-3*a*), 78.7 (C-3) and 68.4 (C-7*a*) ppm, and the final carbon, as in **1** above bore a hydroxyl group (δ 88.7, C-3) ppm.

**Table S1** <sup>1</sup>H (500 MHz) and <sup>13</sup>C NMR (125 MHz) and HMBC spectroscopic data of **1** recorded in CDCl<sub>3</sub> compared with published data

| Carbon       | <sup>13</sup> C | Hydrogen | <sup>1</sup> H                              | in D <sub>2</sub> O [25] |                                 |
|--------------|-----------------|----------|---------------------------------------------|--------------------------|---------------------------------|
|              |                 |          |                                             | <sup>13</sup> C          | <sup>1</sup> H                  |
| C-2          | 86.0            | 4.74     | H-2 (d), <i>J</i> = 5.5 Hz                  |                          | 4.7, <i>J</i> = 5.6 Hz          |
| C-3          | 83.8            | 4.45     | H-3 (t), <i>J</i> = 2.0 Hz, 5.5 Hz          |                          | 4.4, <i>J</i> = 2.2 Hz, 5.6 Hz  |
| C-3 <i>a</i> | 86.2            | 4.95     | H-3 <i>a</i> (t), <i>J</i> = 2.0 Hz, 5.5 Hz |                          | 4.85, <i>J</i> = 2.2 Hz, 5.2 Hz |
| C-5          | 161.5           |          |                                             |                          |                                 |
| C-6          | 140.5           | 6.23     | H-6 (dd), <i>J</i> = 4.5 Hz, 9.5 Hz         |                          | 6.15, dd, <i>J</i> = 10 Hz      |

|               |       |          |                                 |                                |
|---------------|-------|----------|---------------------------------|--------------------------------|
| C-7           | 123.6 | 6.99     | H-7 (dd), $J = 4.0$ Hz, 10.0 Hz | 6.95 (dd), $J = 5$ Hz, 9.95 Hz |
| C-7a          | 68.3  | 4.67     | H7a (t), $J = 2$ Hz, 5 Hz       | 4.5 (t), $J = 5.2$ Hz          |
| C-1'          | 138.2 |          |                                 |                                |
| C-2' and C-6' | 126.3 |          | H-2', H-6'                      |                                |
| C-3' and C-5' | 128.6 | 7.31 (m) | H-3', H-5'                      | 7.3                            |
| C-4'          | 128.8 |          | H-4',                           |                                |

**Table S2.** Comparison of the hydrogen chemical shifts and coupling constants between **2** with 3 other known styryllactones.

| <sup>1</sup> H | Compound <b>2</b>                | (+) -7,8-di-epi-                 |                               |                                   |                                  |
|----------------|----------------------------------|----------------------------------|-------------------------------|-----------------------------------|----------------------------------|
|                |                                  | (+) -iso<br>altholactone [8]     | Altholactone<br>[37]          | (+) -7-epi-<br>Altholactone [37]  | (+) -8-epi-<br>Altholactone [37] |
| H-2            | 4.79 (d), $J = 7.5$ Hz           | 4.79 (d), $J = 7.5$ Hz           | 4.78 (d), $J = 7.3, 4.88$ Hz  | 5.06 (d), $J = 4.4$ Hz            | 5.35 (d), $J = 2.0$ Hz           |
| H-3            | 4.29 (dd), $J = 5.0, 8, 13.5$ Hz | 4.28 (dd), $J = 5.5, 8, 13.5$ Hz | 4.26 (dd), $J = 5.4, 7.3$ Hz  | 4.52 (t), $J = 4.4$ Hz            | 4.50 (d), $J = 2.0$ Hz           |
| H-3a           | 5.08 (t), $J = 5.0, 10.0$ Hz     | 5.07 (t), $J = 5.5, 5.5$ Hz      | 5.04 (dd), $J = 5.4, 5.9$ Hz  | 5.22 (dd), $J = 4.4, 7.8$ Hz      | 5.08 (dd), $J = 2.0, 4.90$ Hz    |
| H-7a           | 4.88 (dd), $J = 5.0, 10.0$ Hz    | 4.89 (t), $J = 4.5, 5.5$ Hz      | 4.88 (dd), $J = 4.4, 5.9$ Hz  | 4.78 (dd), $J = 1.0, 3.4, 7.8$ Hz | 4.88 (t), $J = 4.90, 9.90$ Hz    |
| H-6            | 6.62 (d), $J = 10.0$ Hz          | 6.22 (dd), $J = 0.7, 9.95$ Hz    | 6.20 (d), $J = 9.30$ Hz       | 6.11 (dd), $J = 1.0, 10.3$ Hz     | 6.20 (d), $J = 9.0$ Hz           |
| H-7            | 6.90 (dd), $J = 5.0, 10.0$ Hz    | 6.89 (dd), $J = 4.5, 9.95$ Hz    | 6.87 (dd), $J = 4.4, 9.30$ Hz | 6.85 (dd), $J = 3.4, 10.3$ Hz     | 7.00 (dd), $J = 4.90, 9.80$ Hz   |
| H-1'           |                                  |                                  |                               |                                   |                                  |
| to H-6'        | 7.34 - 7.38 (m)                  | 7.48 (m)                         | 7.30 - 7.38 (m)               | 7.20 - 7.39 (m)                   | 7.33 - 7.43 (m)                  |

**Table S3** <sup>1</sup>H (500 MHz) and <sup>13</sup>C NMR (125 MHz) and HMBC spectroscopic data of **2** recorded in CDCl<sub>3</sub>

| Carbon | <sup>13</sup> C | Hydrogen | <sup>1</sup> H | HMBC             |                  |
|--------|-----------------|----------|----------------|------------------|------------------|
|        |                 |          |                | <sup>2</sup> $J$ | <sup>3</sup> $J$ |

|            |       |            |                                  |      |      |
|------------|-------|------------|----------------------------------|------|------|
| C-2        | 83.5  | H-2        | 4.79 (d), $J = 7.5$ Hz           | C-3  | C-7a |
| C-3        | 78.8  | H-3        | 4.29 (dd), $J = 8$ Hz, 13.5 Hz   |      | C-7a |
| C-3a       | 78.7  | H-3a       | 5.08 (t), $J = 5.0$ Hz, 10.0 Hz  | C-3  |      |
| C-5        | 160.9 |            |                                  |      |      |
| C-6        | 141.6 | H-6        | 6.90 (d), $J = 10.0$ Hz          | C-7  | C-7a |
| C7         | 123.2 | H-7        | 6.26, $J = 5.0$ Hz, 10.0 Hz      | C-7a |      |
| C-7a       | 67.8  | H-7a       | 4.88 (t), $J = 4.5$ Hz, 10.0 Hz, | C-7  |      |
| C-1'       | 138.5 |            |                                  |      |      |
| C-2', C-6' | 125.9 | H-2', H-6' | 7.38                             |      |      |
| C-3', C-5' | 128.6 | H-3', H-5' | 7.36 (m)                         |      |      |
| C-4'       | 128.9 | H-4'       | 7.34                             |      |      |

The UV spectrum supported the functional groups described above peaks with maxima at 217 (carbonyl) and 280 nm (benzene ring). The FT-IR spectrum also showed a C=O stretching band for a carbonyl group ( $1750\text{ cm}^{-1}$ ). Other absorption bands included a broad band for O-H ( $3350\text{ cm}^{-1}$ ), alkyl C-H stretching ( $2810\text{ cm}^{-1}$ ,  $2830\text{ cm}^{-1}$  and  $2942\text{ cm}^{-1}$ ), O-H bend ( $890\text{ cm}^{-1}$ ,  $900\text{ cm}^{-1}$ ,  $1400\text{ cm}^{-1}$  and  $1390\text{ cm}^{-1}$ ) and C-O bend ( $1210\text{ cm}^{-1}$ ,  $1290 - 1300\text{ cm}^{-1}$ ).

The stereochemistry of the compound was determined by comparing the size of the coupling constant from the vicinal coupling of the hydrogens on the chiral centres with that produced by a 6-membered ring cyclohexane [34].

Based on a literature search, **2** is proposed as an unknown compound since there are only three other known stereoisomers and the compound does not completely match any of them (Table 3) in terms of  $^1\text{H}$  and  $^{13}\text{C}$  chemical shifts as well as the stereochemistry determined using the size of the coupling constant of the vicinal coupling between the hydrogens on the chiral centres.

Compound **3** is proposed to be 2,6-dimethoxyisonicotinaldehyde and is a new alkaloid. The compound was isolated as a colourless solid compound from the chloroform extract and stained orange with Dragendorff's reagent. The yield was 0.54% (3 mg). The HRMS gave an ion peak  $[\text{M}-\text{H}]^-$  at 166.0 indicating a molecular formula  $\text{C}_8\text{H}_9\text{O}_3\text{N}$  and the molecular weight of the compound was ( $\text{C}_8\text{H}_9\text{O}_3\text{N}$  calcd. as 167.06).

The  $^1\text{H}$  NMR spectrum (Table S4) showed 9 hydrogens - 2 of them were equivalent aromatic hydrogens at  $\delta_{\text{H}} 7.16$  (H-3, H-5), another 6 hydrogens belonging to 2 equivalent methoxys ( $\delta_{\text{H}}$  to 3.99 ppm - H<sub>3</sub>-8 and H<sub>3</sub>-9) while there was a methine at signal  $\delta_{\text{H}}$  9.82 (H-7) which was attributable to an aldehyde group (C-7). The  $^{13}\text{C}$  NMR spectrum (Table S4) showed 5 carbons - 4 of them were aromatic carbons at  $\delta_{\text{C}}$  147.5 (C-4), 128.9 (C-3 and C-5), 106.8 (C-2 and C-6) ppm. Apart from that, there were 2 carbons at  $\delta_{\text{C}}$  56.7 ppm, which were part of the methoxy groups and another carbonyl carbon at  $\delta_{\text{C}}$  190.9 (C-7) ppm attached to the aromatic ring at C-1.

**Table S4.**  $^1\text{H}$  (500 MHz),  $^{13}\text{C}$  NMR (125 MHz) and HMBC spectroscopic data of **3** and **4** recorded in  $\text{CDCl}_3$ .

| Compound 3 |                 |          |              |      |
|------------|-----------------|----------|--------------|------|
| Carbon     | $^{13}\text{C}$ | Hydrogen | $^1\text{H}$ | HMBC |

|                           |       |                                       |          | $^2J$    | $^3J$    | $^4J$ |
|---------------------------|-------|---------------------------------------|----------|----------|----------|-------|
| N                         |       |                                       |          |          |          |       |
| C-4                       | 147.5 |                                       |          | C-3, C-5 |          |       |
| C-2, C-6                  | 128.9 |                                       |          | C-3, C-5 |          | C-7   |
| C-3, C-5                  | 106.8 | H-3                                   | 7.16 (s) | C-2, C-6 | C-7      |       |
| C-7-CHO                   | 190.9 | H-7                                   | 9.82 (s) |          |          |       |
| C2, C6 – OCH <sub>3</sub> | 56.7  | H <sub>3</sub> -8 , H <sub>3</sub> -9 | 3.98 (s) |          | C-2, C-6 |       |

| Compound 4  |                 |                                        |              |                |  |            |
|-------------|-----------------|----------------------------------------|--------------|----------------|--|------------|
| Carbon      | $^{13}\text{C}$ | Hydrogen                               | $^1\text{H}$ | HMBC           |  |            |
|             |                 |                                        |              | $^2J$ or $^3J$ |  |            |
| C-1         | 35.8            | H <sub>2</sub> -1                      | 2.81         |                |  | C-6'       |
| C2 – C-6    |                 | H <sub>2</sub> -2 – H <sub>2</sub> -5  |              |                |  |            |
| C-7         | 27.4            | H <sub>2</sub> -7                      | 1.98         |                |  | C-8        |
| C-8         | 130.0           | H-8 – H-9                              | 5.29         |                |  |            |
| C-9         | 129.9           | H-9                                    | 5.34         |                |  |            |
| C-10        | 27.4            | H <sub>2</sub> -10                     | 1.98         |                |  | C-9        |
| C-11 - C-15 |                 | H <sub>2</sub> -11– H <sub>2</sub> -15 |              |                |  |            |
| C-16        | 32.0            | H <sub>2</sub> -16                     | 1.47         |                |  | C-17       |
| C-17        | 14.3            | H <sub>3</sub> -17                     | 0.88         |                |  | C-16       |
| C-1'        | 146.2           |                                        |              |                |  | C-2', C-6' |
| C-2'        | 115.2           | H-2'                                   | 7.11 (s)     |                |  | C-6        |
| C-3'        |                 |                                        |              |                |  |            |
| C-4'        | 122.4           | H-4'                                   | 6.68 (s)     |                |  | C-1        |
| C-5'        | 161.2           |                                        |              |                |  | C-6, C-4'  |
| C-6'        | 133.5           | H-6'                                   | 6.61 (s)     |                |  | C-1        |
| C-7'        | 176.1           |                                        |              |                |  |            |
| 3'-OH       |                 |                                        |              |                |  |            |
| 7'-COOH     |                 |                                        |              |                |  |            |

In the HMQC spectrum, the 2 methoxy groups were attached to the aromatic ring at C-2 and C-6 whilst the HMBC spectrum further confirmed this as the 6 equivalent hydrogens from the two methoxy groups coupled with C-2 and C-6 via  $^3J$  correlations. Additionally, C-7 (the aldehyde moiety) was coupled to H-3 and H-5 in the aromatic ring via  $^3J$  correlation. C-3 coupled to H-5 and H-7 and C-5 coupled with H-3 and H-7, both via  $^3J$  correlation as shown in the HMBC spectrum. The HMBC spectrum further indicated that there were  $^2J$  couplings between the tertiary carbon (C-4) with H-3 and H-5.

The FT-IR spectrum was taken by dissolving it in methanol and showed a C=N double bond ( $1650\text{cm}^{-1}$ ) and aldehyde stretching ( $1730\text{cm}^{-1}$ ). There was an alkyl C-H stretching ( $2815\text{ cm}^{-1}$  and  $2940\text{ cm}^{-1}$ ) as well as C-O bend ( $1205\text{ cm}^{-1}$   $1297\text{ cm}^{-1}$ ).

The UV spectrum showed conjugation with peaks at maxima 220 (237.7) and 238 (70.4) (aldehyde) nm.

Based on the above data, **3** is proposed as a new alkaloid, **2,6-dimethoxyisonicotinaldehyde**.

Compound **4** is proposed as (Z)-3-(heptadec-8-en-1-yl)-5-hydroxybenzoic acid which is colourless and was isolated from an ammonia extract using dichloromethane by means of back extraction and the yield was 15 mg (20.5% of the fraction). The double bond of the compound had a small coupling constant ( $<4\text{ Hz}$ ) and therefore is *cis*. The HRMS gave an ion peak  $[M-H]^-$  at  $m/z$  373.2732 which corresponded to the molecular formula  $\text{C}_{24}\text{H}_{38}\text{O}_3$  (calculated as 374.2822).

The  $^1\text{H}$  NMR spectrum (Table S4) showed 38 hydrogens including 14 pairs of methylenes, a methyl triplet at  $\delta_{\text{H}}$  0.88 ppm as well as 2 olefinic hydrogens at  $\delta_{\text{H}}$  5.29 (H-8) and 5.34 (H-9) ppm of the long alkyl chain, three singlet aromatic hydrogens at  $\delta_{\text{H}}$  6.61, 6.68 and 7.11 ppm and 2 hydrogens which were part of the hydroxyl and carboxylic groups attached to the aromatic ring while the  $^{13}\text{C}$  NMR spectrum (Table S4) showed 24 carbons including 14 methylene carbons (C-1 – C-7, C-10 – C-16), 2 olefinic carbons at  $\delta_{\text{C}}$  129.9 and 130.0 ppm and a methyl carbon (C-17) at  $\delta_{\text{C}}$  14.3 ppm attributable to part of the long alkyl chains as well as 3 aromatic methane carbons signals at  $\delta_{\text{C}}$  133.5 (C-2'); 122.3 (C-4') and 115.2 (C-6') ppm, a deshielded aromatic quaternary carbon (C-5') bearing an hydroxyl ( $\delta_{\text{C}}$  161.2 ppm), a further aromatic quaternary carbon (C-3',  $\delta_{\text{C}}$  146.5 ppm) bearing a carboxylic group (C7',  $\delta_{\text{C}}$  176.1 ppm).

The position of the double bond cannot be ascertained using NMR spectra and was therefore determined using GC/MS as employed by Shibamoto [5]. A fragment from the EI mass spectrum obtained from the GC/MS matched the alkenyl chain of the compound **4** which showed that the double bond is positioned between C-8 and C-9 (Figure S31).

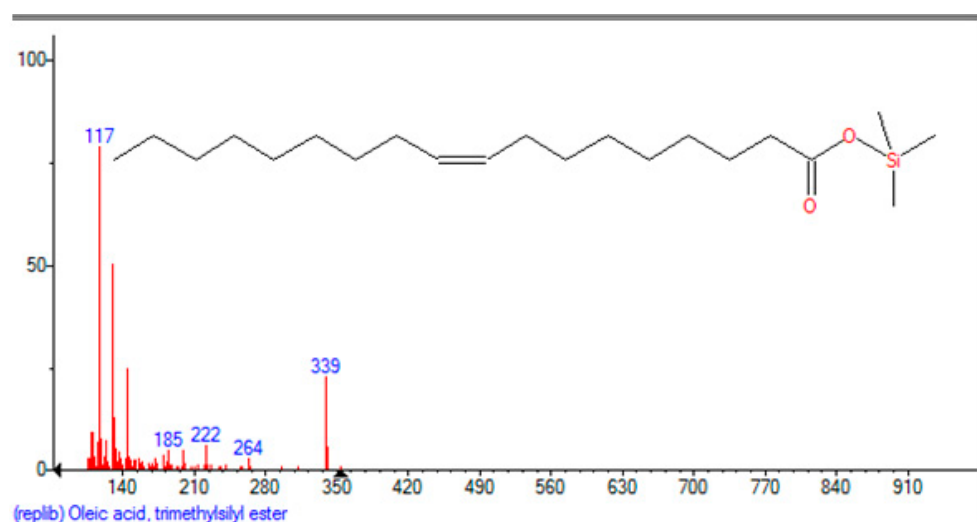

**Figure S31.** The EI mass spectrum of the GC peak corresponding to the alkenyl chain of **4** as identified from the NIST database (fragmentation pattern proposed as oleic acid trimethylsilyl acid).

The structure was further confirmed by the coupling of each hydrogen to the 2<sup>nd</sup> or 3<sup>rd</sup> neighbouring carbons. In the HMBC spectrum, the alkenyl chain was coupled to the aromatic ring via two bonds. H-1 showed  $^3J$  correlations with C-6'/C-2' of the aromatic ring whilst the carboxylic moiety was attached to the aromatic ring at C-3' which was supported by correlations between H-2' and H-4' to C-7'. Furthermore, H-2'

and H-6' also exhibited  $^2J$  correlation with C-2' and C-6' whilst C-5' coupled via  $^2J$  correlation with C-4' and C-6'.

Further confirmation of the structure of the compound was obtained using UV-visible and FT-IR spectroscopic techniques, which showed the presence of a C=C double bond at peak 217 nm and a benzene ring at 290 nm and a C=O stretching for the carboxylic acid ( $1750\text{ cm}^{-1}$ ) was observed. Further absorptions in IR spectrum was attributable to O-H ( $3350\text{ cm}^{-1}$ ), alkyl C-H stretching ( $2810\text{ cm}^{-1}$ ,  $283\text{ cm}^{-1}$  and  $2942\text{ cm}^{-1}$ ), O-H bend ( $890\text{ cm}^{-1}$ ,  $900\text{ cm}^{-1}$ ,  $1400\text{ cm}^{-1}$  and  $1390\text{ cm}^{-1}$ ) and C-O bend ( $1210\text{ cm}^{-1}$ ,  $1290\text{ cm}^{-1}$  and  $1300\text{ cm}^{-1}$ ) were also present.

Based on the above data, **4** is proposed as the new natural product (Z)-3-(heptadec-8-en-1-yl)-5-hydroxybenzoic acid.

### 1.1. Determination of the location of double bonds in alkenyl chains and the derivatization protocol

The Gas chromatography-mass spectrometry (GCMS) together with EI ionization method and helium gas as the mobile phase. In order to determine the location of a double bond in a long chain such as in alkenyl phenols, there is a need to prepare a dimethyl disulfide (DMS) derivatives (adducts) from the compound. If a hydroxyl group is present, then there is a need to perform derivatization first as the hydroxylated compound group has poor chromatographic properties in Gas Chromatography (GC).

The preparation of the dimethyl disulphide derivative is shown in **Figure S32**.

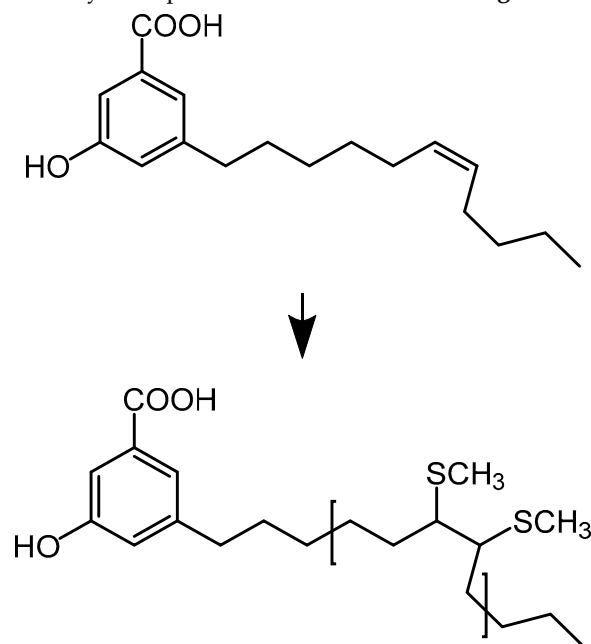

**Figure S32.** Preparation of dimethyl disulphide derivatives

To the DMS adducts,  $200\text{ }\mu\text{L}$  of bis(trimethylsilyl)trifluoroacetamide and trimethylchlorosilane (BSTFS-TMCS 99:1) were added. The mixture was left to stand at room temperature for 30 minutes. It was then analysed using GC-MS. The derivatisation of the hydroxyl group is shown in **Figure S33**

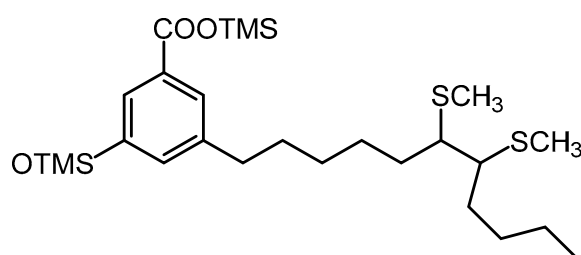

**Figure S33.** Derivatisation of the hydroxyl groups

## References

1. Loder, J.W.; Nearn, R.H. Altholactone: a novel tetrahydrofuran[3,2b] pyran-5-one from a *Polyalthia* species. *Heterocycl.* **1997**, 7, 113-118.
2. Colegate, S.M.; Laily, B.D.; Latiff, A.; Mat Salleh, K.; Samsudin, M.W. ; Skelton, B.W.; Tadan, K.I.; White, A.H.; Zuriati Z. (+)-Isoaltholactone: A furanopyrone isolated from *Goniothalamus* species *Phytochem.* **1990**, 1701-1704. doi:10.1016/0031-9422(90)80153-8
3. Reich, H.J. 5-HMR-5 Vicinal proton-proton coupling  $^2J$  H-H. 2008, available online: <https://organicchemistrydata.org/hansreich/resources/nmr/#05-hmr-05-3j/> (accessed on 1 June 2020).
4. Ueno, Y., Tadano, K.-I., Ogawa, S. Total synthesis of (+)-altholactone [(+)-Goniothalenol] and three stereocongeners and their cytotoxicity against several tumor cells. *Bull. Chem. Soc. Jpn.* **1989**, 62, 2328-2337.
5. Shibamoto, S.; Murata, T.; Yamamoto, K. Determination of double bond positions and geometry of methyl lineolate isomers with dimethyl disulfide adducts by GC/MS. *Lipids.* **2016**, 51, 1077-1081.
